# Supplementary material for: Structure and excited-state dynamics of dimeric copper(i) photosensitizers investigated by time-resolved X-ray and optical transient absorption spectroscopy
Source: Royal Society of Chemistry journal article supplement (doi:10.1039/d0cp06080a), 2021-01-01
Supplement: d0cp06080a1.pdf [file d0cp06080a1.pdf]

## Supporting Information

### Structure and Excited-State Dynamics of Dimeric Copper(I) photosensitizers Investigated by Time-resolved X-ray and Optical Transient Absorption Spectroscopy

Lucía Velasco<sup>a</sup>, Leonel Llanos<sup>b</sup>, Pedro Levín,<sup>b</sup> Andrés Vega,<sup>c</sup> Jin Yu<sup>d</sup>, Xiaoyi Zhang<sup>d</sup>, Luis Lemus<sup>\*b</sup>, Daniel Aravena<sup>\*b</sup>, Dooshaye Moonshiram<sup>\*a</sup>

<sup>a</sup>. Instituto Madrileño de Estudios Avanzados en Nanociencia (IMDEA Nanociencia), Calle Faraday, 9, 28049 Madrid, Spain

<sup>b</sup>. Departamento de Química de los Materiales, Universidad de Santiago de Chile, Santiago, Chile

<sup>c</sup>. Facultad de Ciencias Exactas, Departamento de Ciencias Químicas, Universidad Andrés Bello, Viña de Mar, Chile; Centro para el Desarrollo de Nanociencias y Nanotecnología, CEDENNA, Santiago, Chile.

<sup>d</sup>. X-ray Science Division, Argonne National Laboratory, 9700 S. Cass Avenue, Lemont IL, 60439, U.S.A

| Table of Contents                                                                                                                                                                                          | Page No.    |
|------------------------------------------------------------------------------------------------------------------------------------------------------------------------------------------------------------|-------------|
| Experimental Details                                                                                                                                                                                       | S2          |
| Crystal data and structure refinement details for <b>C1</b> .                                                                                                                                              | S3          |
| EXAFS fit parameters for <b>C1-C3</b>                                                                                                                                                                      | S4          |
| Determination of Photon flux and ruling out possibilities of multi-photon effects                                                                                                                          | S5          |
| <sup>1</sup> H-NMR spectrum of <b>C1</b>                                                                                                                                                                   | S6          |
| UV-vis spectrum of <b>C1</b> in H <sub>2</sub> O                                                                                                                                                           | S7          |
| Intramolecular p-stacking between helicates of <b>C1</b>                                                                                                                                                   | S7          |
| Overlay of the structures of <i>M</i> enantiomers of <b>C1</b> and <b>C2</b>                                                                                                                               | S8          |
| TD-DFT calculations over pre-edge and XANES region of <b>C1-C3</b>                                                                                                                                         | S9          |
| Calculated Electronic transitions for <b>C1-C3</b> at the singlet and triplet state geometries                                                                                                             | S10-<br>S15 |
| TD-DFT XAS calculation for each Cu centre                                                                                                                                                                  | S16         |
| TD-DFT transient XAS calculation for each Cu centre                                                                                                                                                        | S17         |
| Determination of Excited State fraction of <b>C1-C3</b>                                                                                                                                                    | S18-<br>19  |
| Spin density isosurfaces calculated for compounds <b>C1-C3</b>                                                                                                                                             | S20         |
| Global kinetic decay profiles of optical transient absorption spectra of <b>C1-C3</b>                                                                                                                      | S21         |
| DFT optimized coordinates of <b>C1-C3</b> in the ground and excited states using B3LYP as functional including Grimme's empirical dispersion correction (BP3IYP- D3BJ) and with and without the PCM model. | S22-<br>S47 |
| References                                                                                                                                                                                                 | S48         |

## Experimental Details

**Extended X-ray Absorption Fine Structure (EXAFS) Analysis.** Athena software<sup>1, 2</sup> was used for data processing. The energy scale for each scan was normalized using copper metal standard. Data in energy space were pre-edge corrected, normalized, deglitched (if necessary), and background corrected. The processed data were next converted to the photoelectron wave vector (k) space and weighted by  $k^2$ . The electron wave number is defined as  $k = [2m(E - E_0)/\hbar^2]^{1/2}$ ,  $E_0$  is the energy origin or the threshold energy. K-space data were truncated near the zero crossings  $k = 2$  to  $11.2 \text{ \AA}^{-1}$  for all **C1-C3** in Cu EXAFS Fourier transformation. The k-space data were transferred into the Artemis Software for curve fitting. In order to fit the data, the Fourier peaks were isolated separately, grouped together, or the entire (unfiltered) spectrum was used. The individual Fourier peaks were isolated by applying a Hanning window to the first and last 15% of the chosen range, leaving the middle 70% untouched. Curve fitting was performed using *ab initio*-calculated phases and amplitudes from the FEFF8<sup>2</sup> program from the University of Washington. *Ab initio*-calculated phases and amplitudes were used in the EXAFS equation (Equation 1),

$$\chi(k) = S_0^2 \sum_j \frac{N_j}{kR_j^2} f_{\text{eff}_j}(\pi, k, R_j) e^{-2\sigma_j^2 k^2} e^{\frac{-2R_j}{\lambda_j(k)}} \sin(2kR_j + \phi_{ij}(k)) \quad (\text{Equation S1})$$

where  $N_j$  is the number of atoms in the  $j^{\text{th}}$  shell;  $R_j$  the mean distance between the absorbing atom and the atoms in the  $j^{\text{th}}$  shell;  $f_{\text{eff}_j}(\pi, k, R_j)$  is the *ab initio* amplitude function for shell  $j$ , and the Debye-Waller term  $e^{-2\sigma_j^2 k^2}$  accounts for damping due to static and thermal disorder in absorber-backscatterer distances. The mean free path term  $e^{\frac{-2R_j}{\lambda_j(k)}}$  reflects losses due to inelastic scattering, where  $\lambda_j(k)$ , is the electron mean free path. The oscillations in the EXAFS spectrum are reflected in the sinusoidal term  $\sin(2kR_j + \phi_{ij}(k))$ , where  $\phi_{ij}(k)$  is the *ab initio* phase function for shell  $j$ . This sinusoidal term shows the direct relation between the frequency of the EXAFS oscillations in k-space and the absorber-backscatterer distance.  $S_0^2$  is an amplitude reduction factor.

The EXAFS equation<sup>3</sup> (Eq. S1) was used to fit the experimental Fourier isolated data (q-space) as well as unfiltered data (k-space) and Fourier transformed data (R-space) using  $N$ ,  $S_0^2$ ,  $E_0$ ,  $R$ , and  $\sigma^2$  as variable parameters (Table S1).  $N$  refers to the number of coordination atoms surrounding Cu for each shell. The quality of fit was evaluated by R-factor and the reduced  $\text{Chi}^2$  value. The deviation in  $E_0$  ought to be less than or equal to 10 eV. R-factor less than 2% denotes that the fit is good enough. R-factor between 2 and 5% denotes that the fit is correct within a consistently broad model. The reduced  $\text{Chi}^2$  value is used to compare fits as more absorber-backscatter shells are included to fit the data. A smaller reduced  $\text{Chi}^2$  value implies a better fit. Similar results were obtained from fits done in k, q, and R-spaces.

**Table S1.** Crystal data and structure refinement details for **C1**.

| C1: C <sub>58</sub> H <sub>55</sub> Cl <sub>2</sub> Cu <sub>2</sub> N <sub>9</sub> O <sub>4</sub> |                                              |
|---------------------------------------------------------------------------------------------------|----------------------------------------------|
| FW/uma                                                                                            | 1140.09                                      |
| Crystal System                                                                                    | Triclinic                                    |
| Space Group                                                                                       | <i>P</i> <sup>-</sup> 1                      |
| a (Å)                                                                                             | 12.1101(15)                                  |
| b (Å)                                                                                             | 15.0255(18)                                  |
| c (Å)                                                                                             | 15.7251(19)                                  |
| a (°)                                                                                             | 75.136(1)                                    |
| b (°)                                                                                             | 67.643(1)                                    |
| g (°)                                                                                             | 87.203(2)                                    |
| V (Å <sup>3</sup> )                                                                               | 2553.9 (5)                                   |
| Z(Z')                                                                                             | 2                                            |
| d (g cm <sup>-3</sup> )                                                                           | 1.483                                        |
| m (mm <sup>-1</sup> )                                                                             | 1.00                                         |
| F(000)                                                                                            | 1180.0                                       |
| q range                                                                                           | 2.5–28.6                                     |
| hkl range                                                                                         | -14 ≤ h ≤ 14<br>-18 ≤ l ≤ 18<br>-19 ≤ k ≤ 19 |
| N <sub>tot</sub> , N <sub>uniq</sub> (R <sub>int</sub> ), N <sub>obs</sub>                        | 91681, 10027 (0.052), 7709                   |
| Ref. Parameters                                                                                   | 697                                          |
| R1, wR2 (obs)                                                                                     | 0.050, 0.159                                 |
| Max. and min D <sub>r</sub> e Å <sup>-3</sup>                                                     | 1.27 and -0.98                               |

## EXAFS fit parameters for C1-C3

**Table S2.** Overview of the applied EXAFS fit parameters for **C1-C3** in solution phase.

| Sample                                 | Fit | Region | Shell, N | R, Å    | E <sub>0</sub> | ss. <sup>2</sup><br>(10 <sup>-3</sup> ) | R-factor | Reduced Chi-square |
|----------------------------------------|-----|--------|----------|---------|----------------|-----------------------------------------|----------|--------------------|
| <b>C1</b>                              | 1   | I      | Cu-N, 4  | 2.01(3) | -0.3 (2.3)     | 8.6(2.2)                                | 0.0094   | 1669               |
| <b>C2</b>                              | 2   | I      | Cu-N, 4  | 2.00(2) | -0.6(2.2)      | 7.9(2.0)                                | 0.0083   | 1553               |
| <b>C3</b>                              | 3   | I      | Cu-N, 4  | 2.02(1) | 3.9(1.3)       | 7.5(1.1)                                | 0.0025   | 662                |
| <b>C1 Reconstructed Laser on state</b> | 4   | I      | Cu-N, 4  | 1.95(1) | -0.3*          | 8.6*                                    | 0.0164   | 12                 |
| <b>C2 Reconstructed Laser on state</b> | 5   | I      | Cu-N, 4  | 1.95(1) | -0.6*          | 7.9*                                    | 0.0107   | 25                 |
| <b>C3 Reconstructed Laser on state</b> | 6   | I      | Cu-N, 4  | 1.97(1) | 3.3*           | 8.5*                                    | 0.0100   | 33                 |

\* Region I corresponds to the fit between 1.1- 2.1 Å, in apparent distance scale for **C1-C3**. The reconstructed excited state of **C1, C2 and C3** corresponds to the subtraction of the EXAFS data of the “Laser ON” states from the ground/ “Laser off” states.

### Determination of Photon flux and ruling out possibilities of multi-photon effects

Multi-photon excitations are unlikely to occur under our experimental conditions considering the relatively long laser pulse width (1.6 ps) and low laser photon density. The photon flux (number of photons/pulse/molecule) was calculated in this case to be ~0.8, showing that the measurements reported in the manuscript were carried out in the linear regime. We also clarify that due to the dilute solution of the copper photosensitizers **C1-C3** (2 mM) hereby used, two-photon excitation process can be ruled due to the small cross section.

**Table S3:** Parameters employed in the calculation of the photon flux

|                                                                                         |                                               |
|-----------------------------------------------------------------------------------------|-----------------------------------------------|
| <b>Concentration [mol/L]</b>                                                            | $2 \times 10^{-3}$ mol                        |
| <b>Pump beam depth</b>                                                                  | 650 $\mu\text{m}$ (cylindrical jet)           |
| <b>Laser spot size</b>                                                                  | 170 $\mu\text{m}$ (V) x 750 $\mu\text{m}$ (H) |
| <b>Maximum effective area corresponding to the central plane of the cylindrical jet</b> | 170 $\mu\text{m}$ (V) x 650 $\mu\text{m}$ (H) |
| <b>Volume of illuminated area</b>                                                       | $5.641 \times 10^7 \text{ um}^3$              |
| <b>Molecules in illuminated area</b>                                                    | $6.794 \times 10^{13}$                        |
| <b>Pulse energy</b>                                                                     | $\sim 42 \mu\text{J}$                         |
| <b>Excitation wavelength</b>                                                            | 400 nm                                        |
| <b>Photons/Pulse</b>                                                                    | $8.458 \times 10^{13}$                        |
| <b>Photons/Pulse on portion of cylindrical sample jet</b>                               | $5.757 \times 10^{13}$                        |
| <b>Photon flux<br/>Photons/pulse/molecule</b>                                           | $\sim 0.8$                                    |

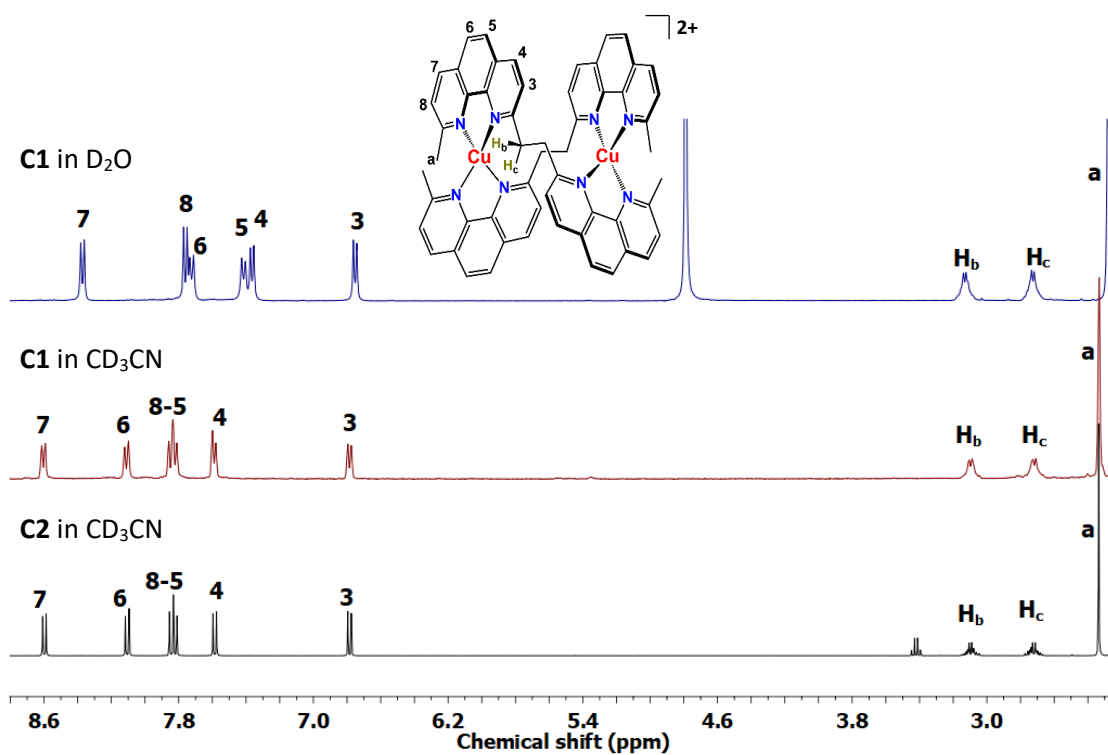

**Figure S1.**  $^1\text{H}$ -NMR spectrum of **C1** in  $\text{D}_2\text{O}$  (top) and  $\text{CD}_3\text{CN}$  (middle) and **C2** in  $\text{CD}_3\text{CN}$  (bottom) at 298K.

In deuterated water (top), the  $^1\text{H}$ -NMR spectra of **C1** shows in the aromatic region between 6.5 and 8.5 ppm the characteristic pattern of signals for disubstituted phenanthrolines. The protons of the aliphatic spacer appear as two pseudo-doublets (3.19 and 2.67 ppm), in agreement with their diastereotopic behavior due to the helical folding of the ligands around the copper atoms, which is indicative of a helical conformation. The existence of a single set of well-defined resonances implies that the four phenanthroline moieties are equivalent each other ( $D_2$  symmetry), indicating that the intermolecular interactions observed in the crystal structure of **C1** are lost in solution. The same can be concluded from the spectra of **C1** (middle) and **C2** (bottom) in deuterated acetonitrile, where the protons of the ligands in both compounds have the same chemical environment, irrespective of the counterion's nature.

**C1:**  $^1\text{H}$ -NMR (400 MHz,  $\text{D}_2\text{O}$ )  $\delta$  ppm: 8.37 (d,  $J = 8.2$  Hz, 1H), 7.76 (d,  $J = 8.2$  Hz, 1H), 7.72 (d,  $J = 8.8$  Hz, 1H), 7.41 (d,  $J = 8.6$  Hz, 1H), 7.36 (d,  $J = 8.2$  Hz, 1H), 6.75 (d,  $J = 8.2$  Hz, 1H), 3.19 – 3.07 (m, 1H), 2.79 – 2.67 (m, 1H).

**C1:**  $^1\text{H}$  NMR (400 MHz,  $\text{CD}_3\text{CN}$ )  $\delta$  ppm: 8.60 (d,  $J = 8.3$  Hz, 1H), 8.11 (d,  $J = 8.9$  Hz, 1H), 7.86 – 7.81 (m, 2H), 7.59 (d,  $J = 7.9$  Hz, 1H), 6.78 (d,  $J = 8.4$  Hz, 1H), 3.12 – 3.04 (m, 1H), 2.75 – 2.66 (m, 1H), 2.33 (s, 3H).

**C2:**  $^1\text{H}$  NMR (400 MHz,  $\text{CD}_3\text{CN}$ )  $\delta$  ppm: 8.60 (d,  $J = 8.3$  Hz, 1H), 8.11 (d,  $J = 8.9$  Hz, 1H), 7.86 – 7.80 (m, 2H), 7.59 (d,  $J = 8.3$  Hz, 1H), 6.79 (d,  $J = 8.3$  Hz, 1H), 3.15 – 3.04 (m, 1H), 2.78 – 2.66 (m, 1H), 2.34 (s, 3H).

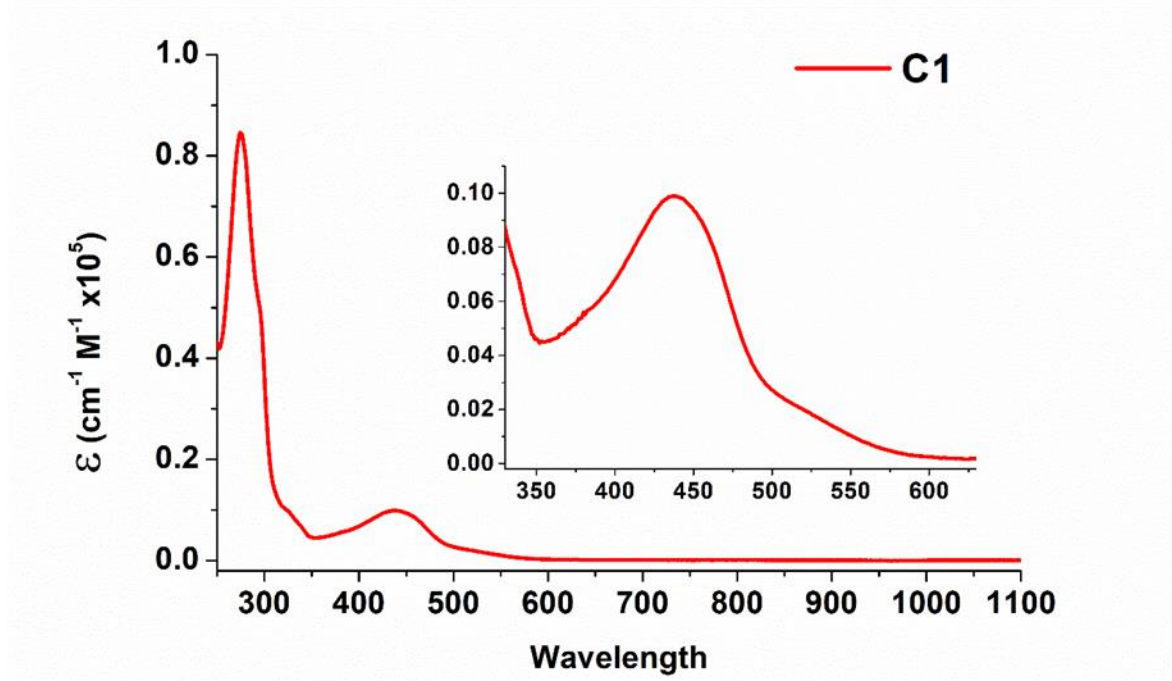

**Figure S2.** UV-vis spectrum of **C1** in H<sub>2</sub>O at 298K. Inset: MLCT band.

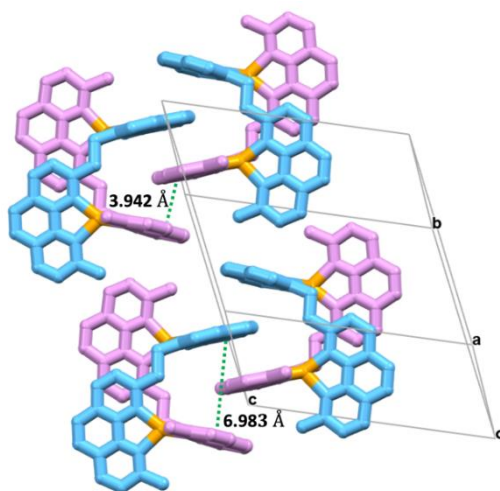

**Figure S3.** Crystal packing of **C1**. Distances between stacked phenanthroline rings are presented. The ligands are coloured to highlight the chirality *M* or *P* of the molecules. Ellipsoids are at a 50% of probability. Protons are omitted for clarity.

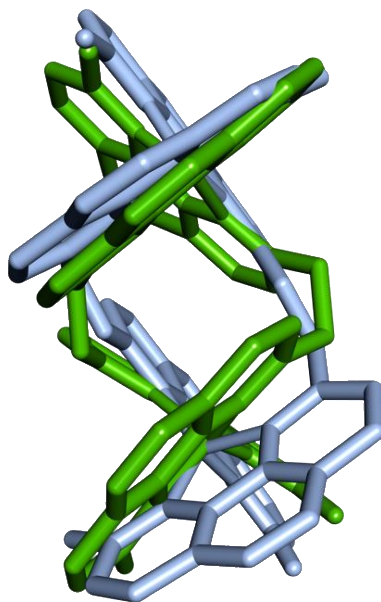

**Figure S4:** Overlay of the structures of *M-C1* (green) and *M-C2* (light blue). Superimposition was carried out considering the highest coincidence in the Cu-N<sub>4</sub> cores of both complexes.



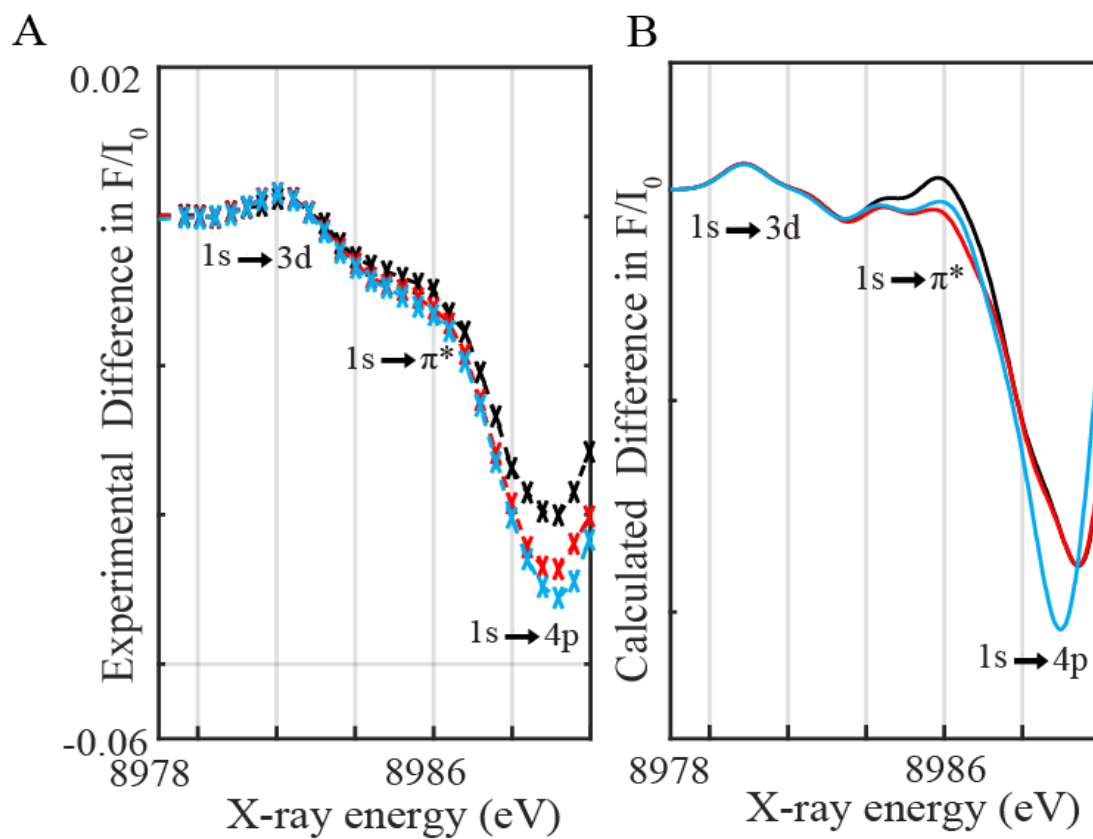

**Figure S5** A. Experimental and B. Calculated TD-DFT transient XAS spectra of **C1-C3** over the pre-edge and part of the rising-edge region.

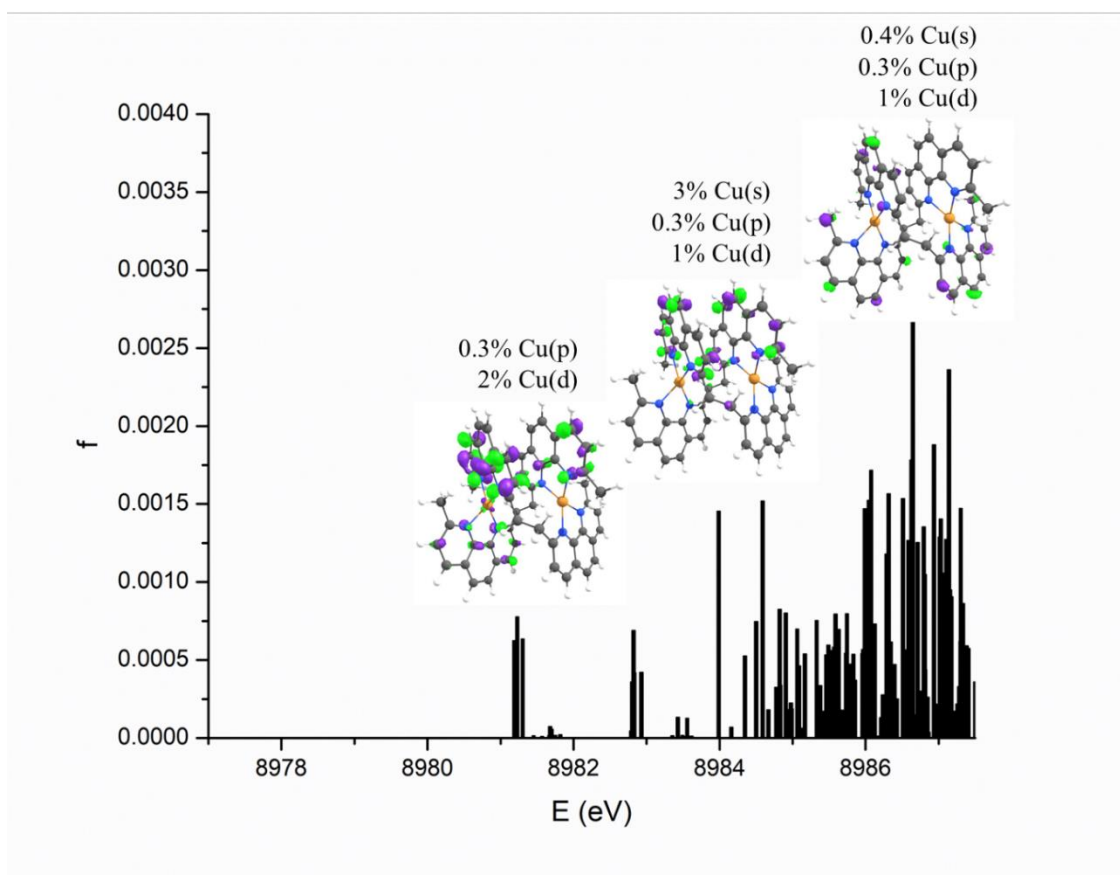

**Figure S6.** First 160 vertical electronic transitions (black bars) from the 1s orbitals of the copper(I) centers calculated by means of TDDFT for the compound **C1** at the **ground state** geometry. Most contributing orbitals of transitions with high oscillator strength are shown with its respective composition of orbitals of the copper atoms (s, p, d).

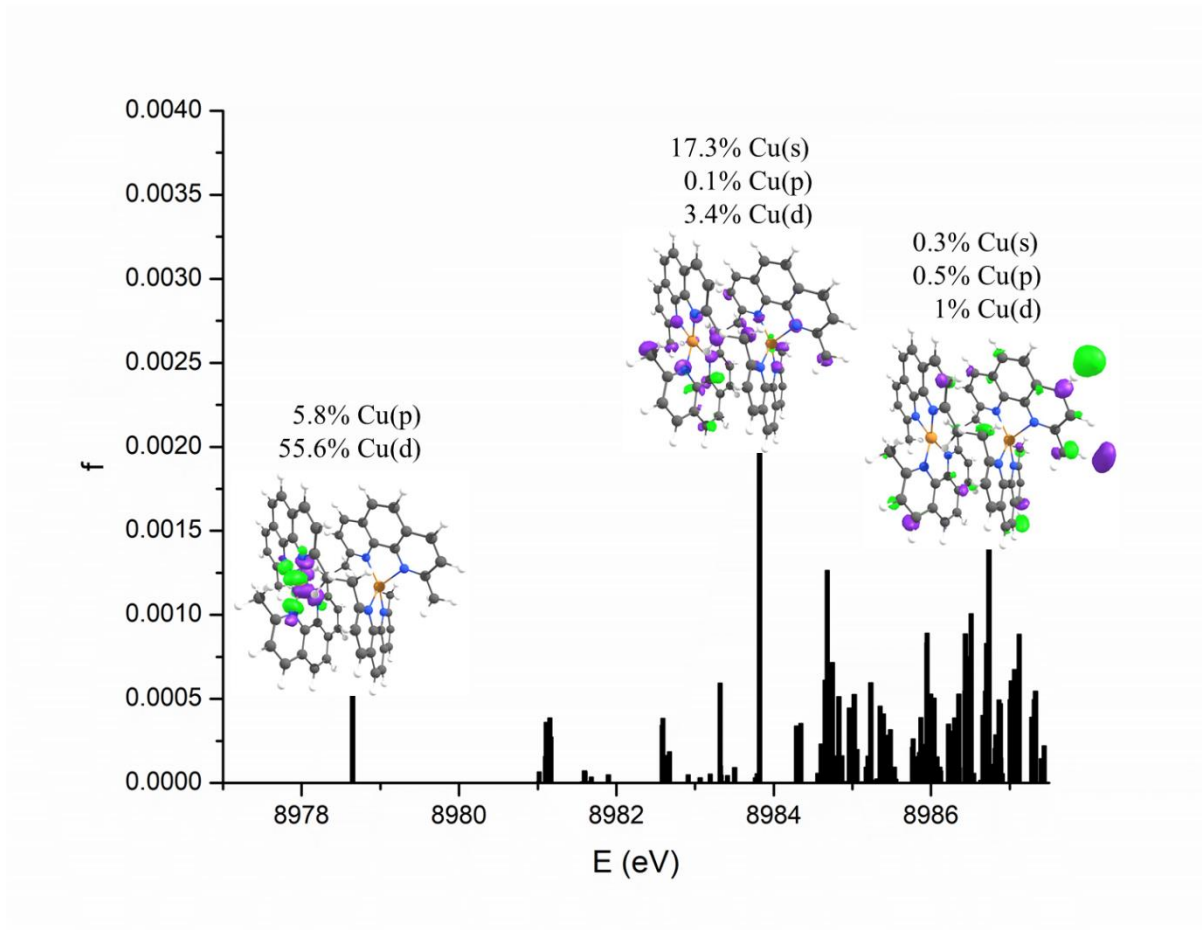

**Figure S7.** First 160 vertical electronic transitions (black bars) from the 1s orbitals of the copper(I) centers calculated by means of TDDFT for the compound **C1** at the **triplet state** geometry. Most contributing orbitals of transitions with high oscillator strength are shown with its respective composition of orbitals of the copper atoms (s, p, d).

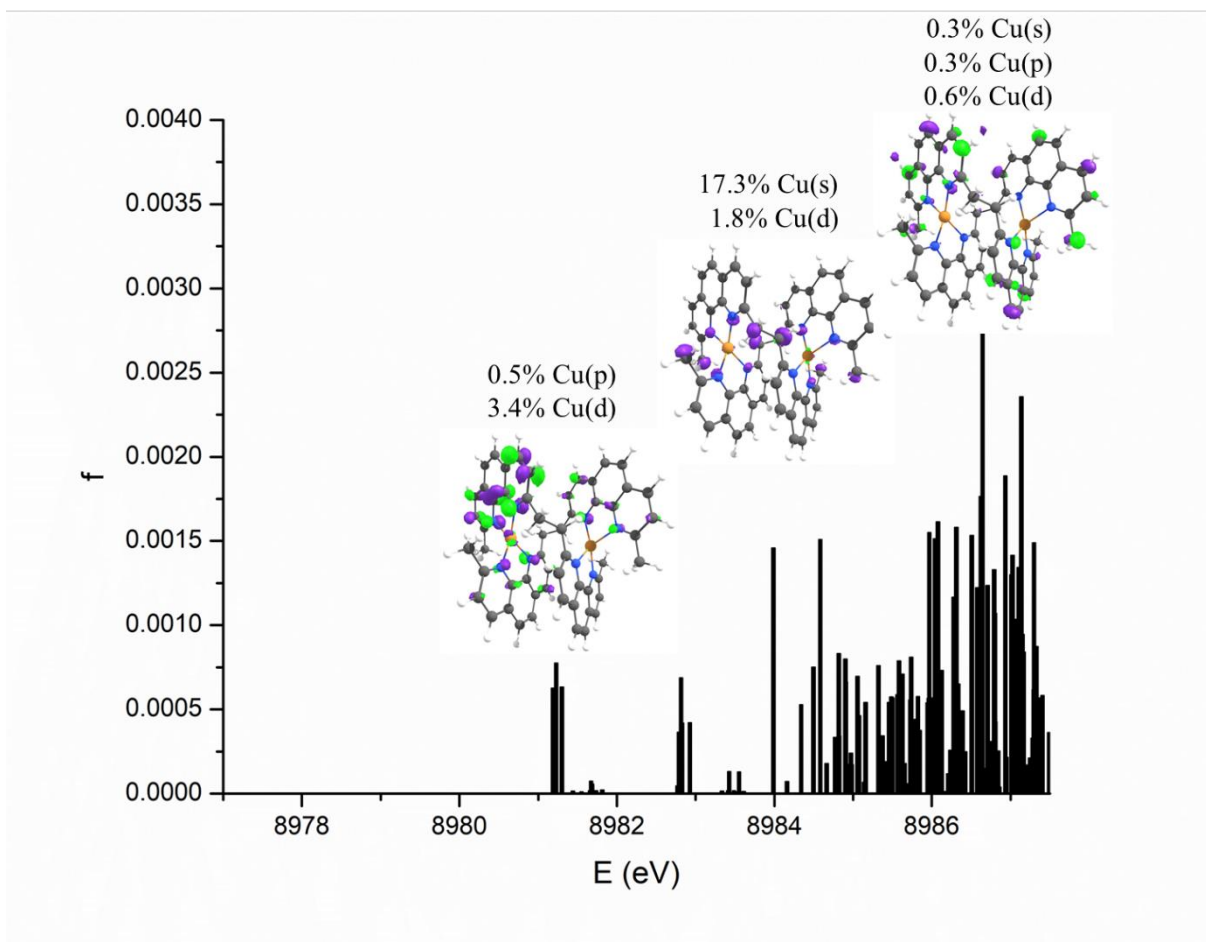

**Figure S8.** First 160 vertical electronic transitions (black bars) from the 1s orbitals of the copper(I) centers calculated by means of TDDFT for the compound **C2** at the **ground state** geometry. Most contributing orbitals of transitions with high oscillator strength are shown with its respective composition of orbitals of the copper atoms (s, p, d).

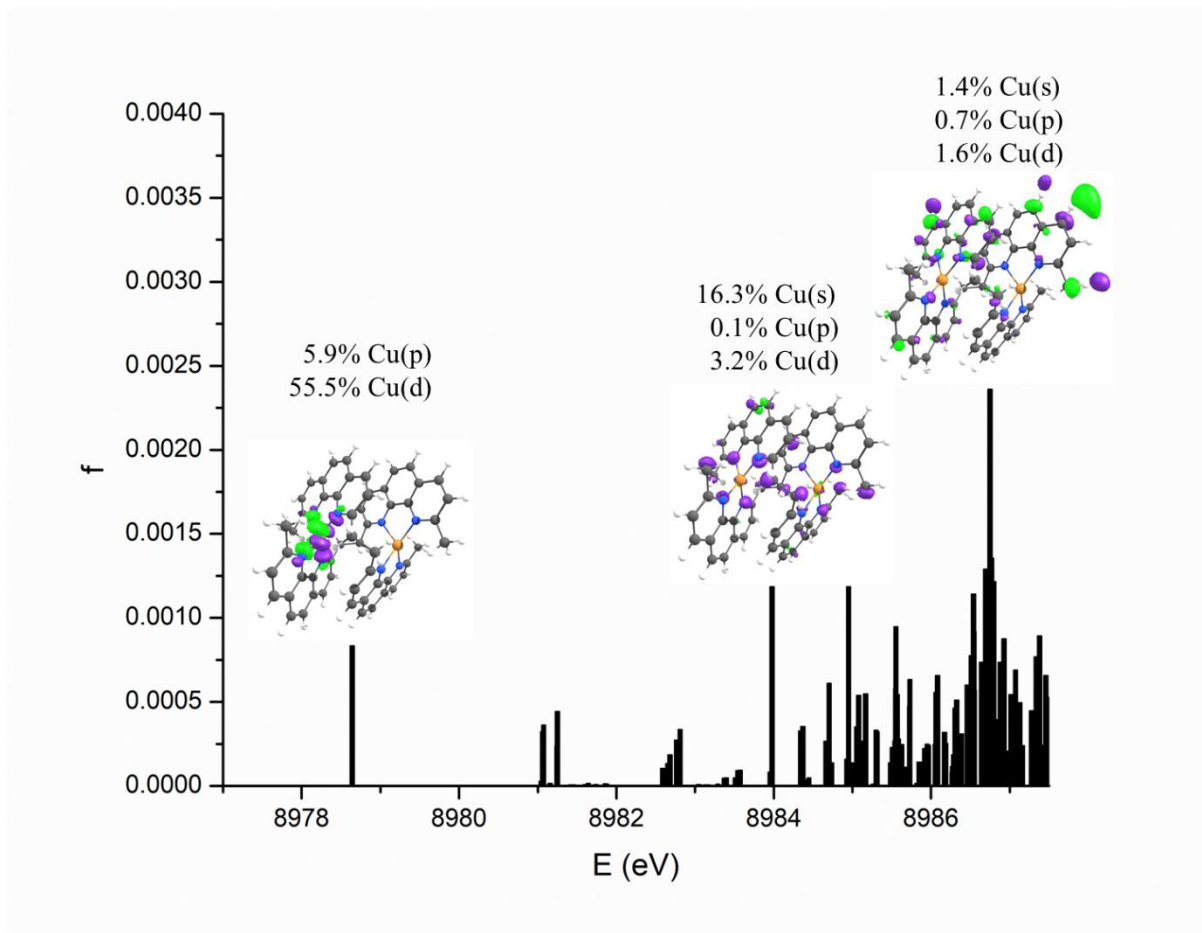

**Figure S9.** First 160 vertical electronic transitions (black bars) from the 1s orbitals of the copper(I) centers calculated by means of TDDFT for the compound **C2** at the **triplet state** geometry. Most contributing orbitals of transitions with high oscillator strength are shown with its respective composition of orbitals of the copper atoms (s, p, d).

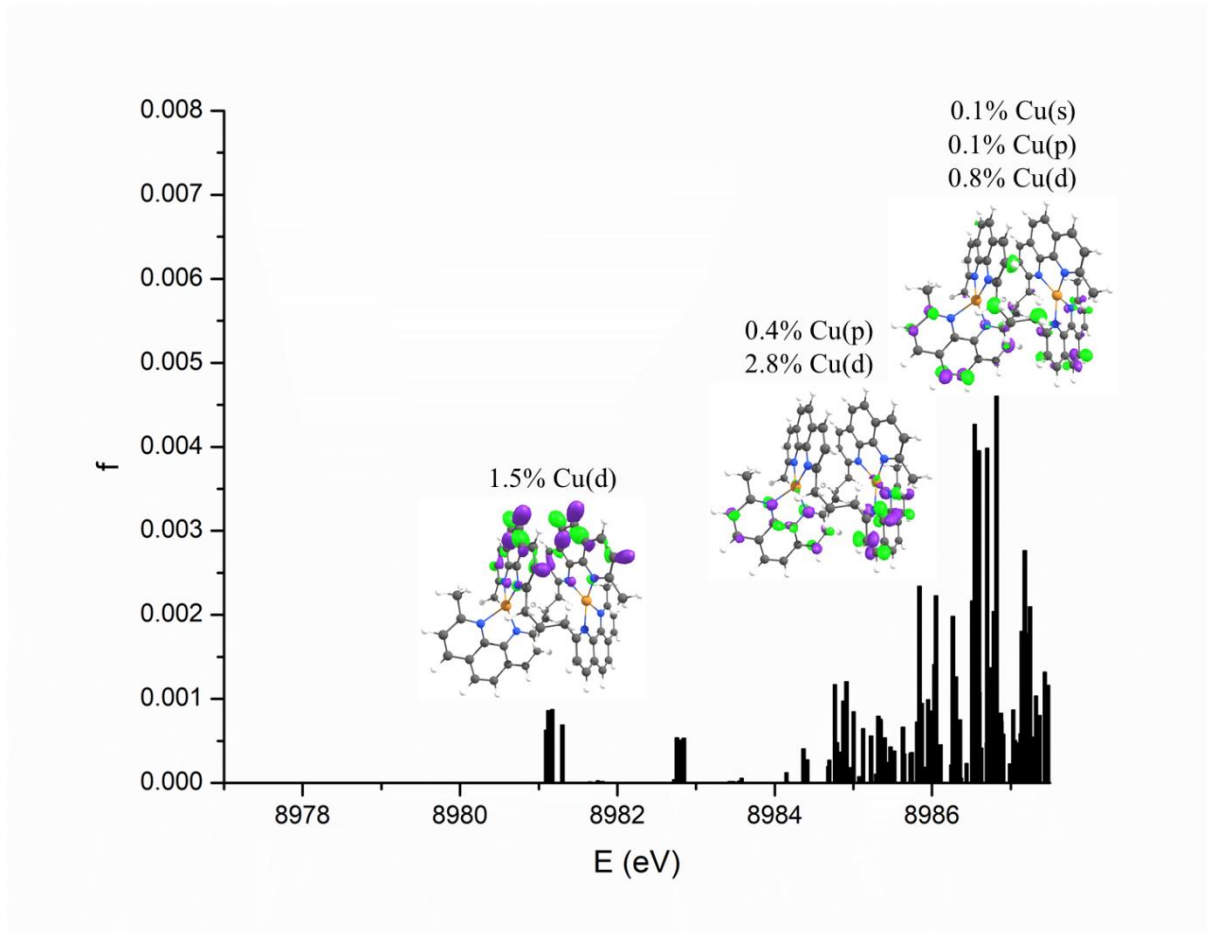

**Figure S10.** First 160 vertical electronic transitions (black bars) from the 1s orbitals of the copper(I) centers calculated by means of TDDFT for the compound **C3** at the **ground state** geometry. Most contributing orbitals of transitions with high oscillator strength are shown with its respective composition of orbitals of the copper atoms (s, p, d).

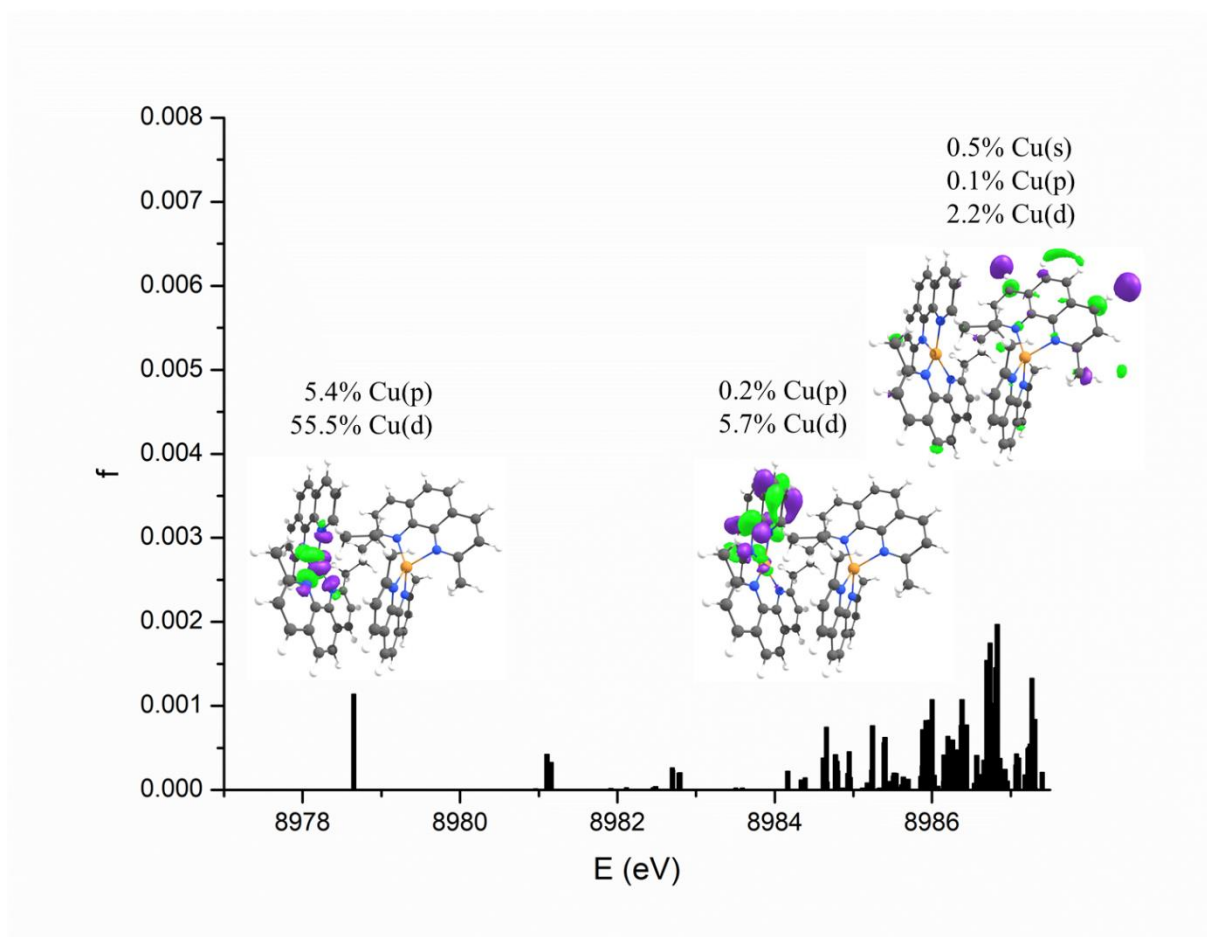

**Figure S11.** First 160 vertical electronic transitions (black bars) from the 1s orbitals of the copper(I) centers calculated by means of TDDFT for the compound **C3** at the **triplet state** geometry. Most contributing orbitals of transitions with high oscillator strength are shown with its respective composition of orbitals of the copper atoms (s, p, d).

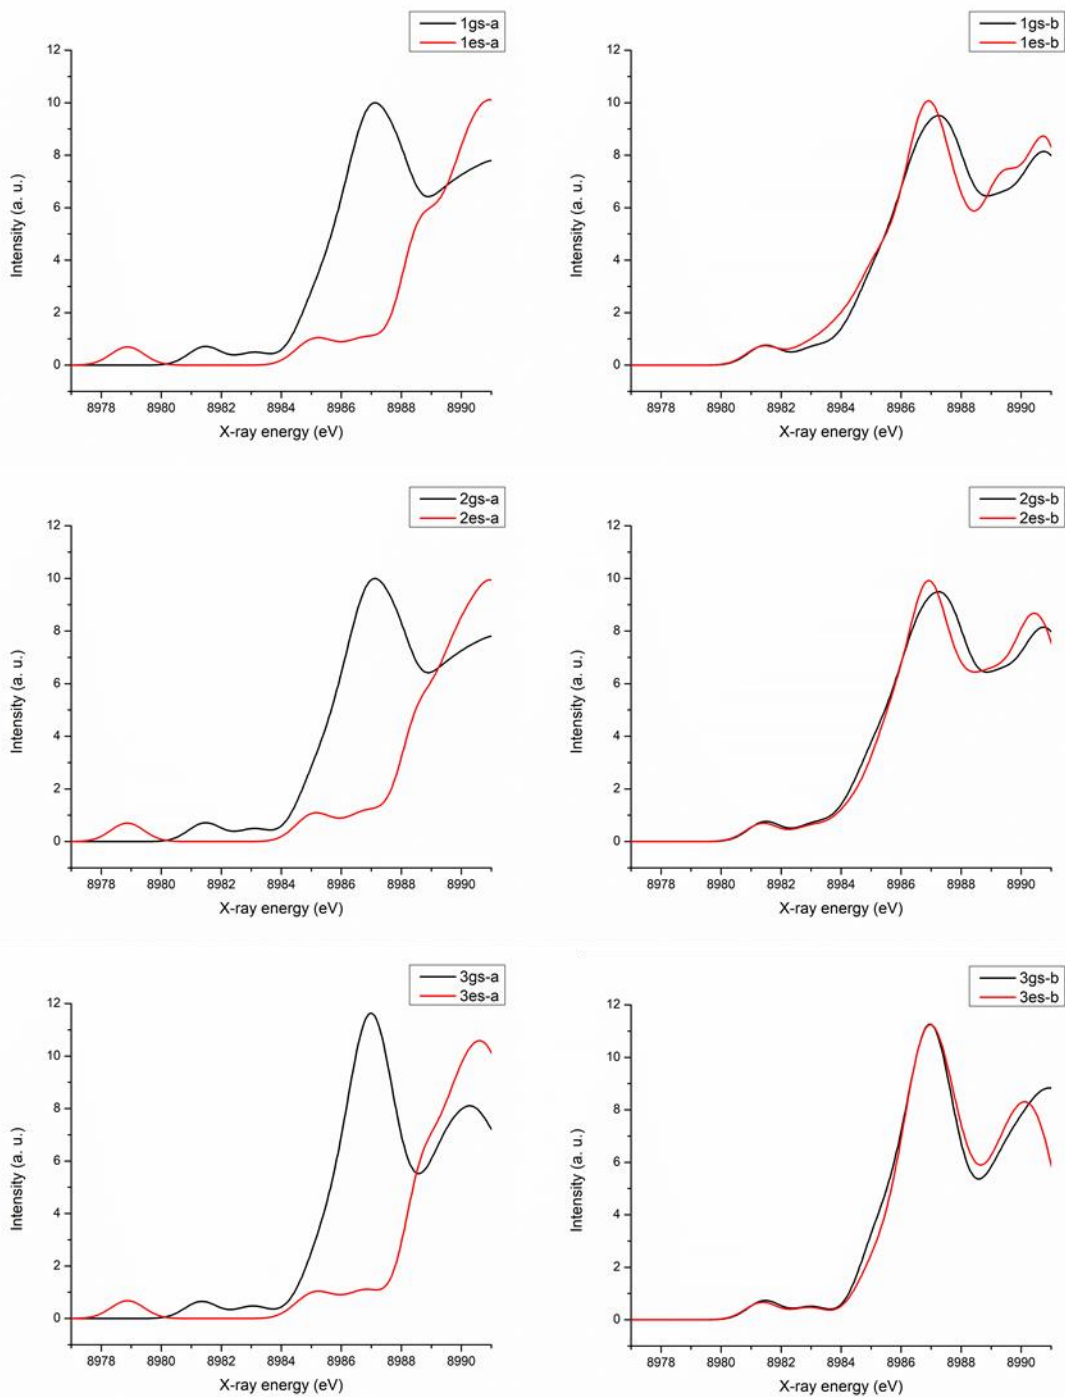

**Figure S12.** Calculated TD-DFT XAS spectra for each copper atom (denoted as a and b). Black and red lines correspond to the ground and excited state geometries, respectively.



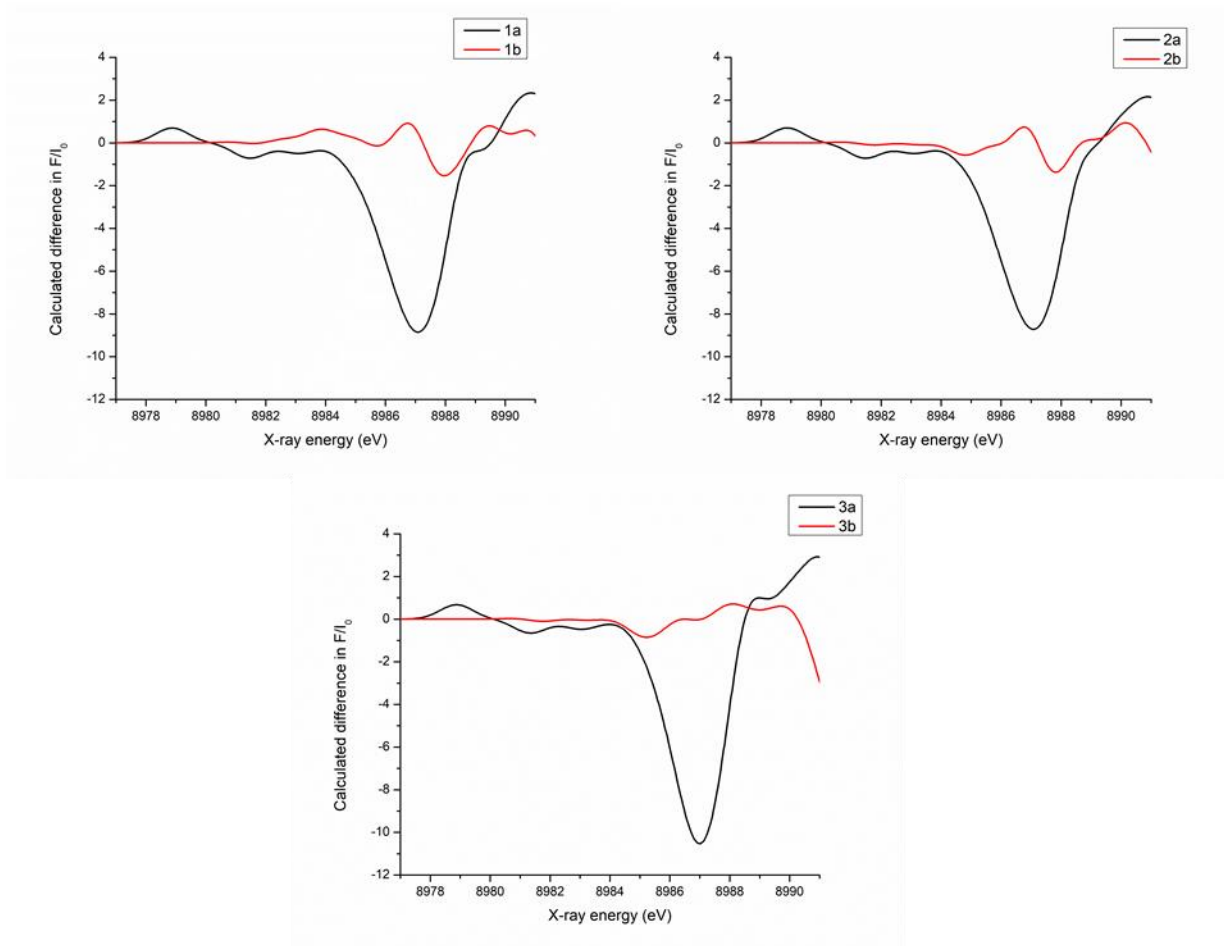

**Figure S13.** Calculated TD-DFT transient XAS spectra for each copper atom where black and red lines are referred to the copper atoms denoted as a and b, respectively.

The  $[\text{Cu}^{\text{I}}(\text{L}_4)_2](\text{ClO}_4)_2$  complex previously reported by Pal<sup>4</sup>, Lange<sup>5</sup> et al was used as a reference complex where  $\text{L}_4$  is a bis-schiff base ligand with alkyl spacers ( $\text{L} = 4\text{-CH}_2\text{-}$ ). This dimeric complex dissociates in acetonitrile solution as previously reported<sup>5, 6</sup> yielding the monometallic complex  $[\text{Cu}^{\text{I}}(\text{L}_4)]^+$ . In the presence of tetrachloroethane,  $\text{CCL}_4$ , the monomeric complex oxidizes spontaneously.

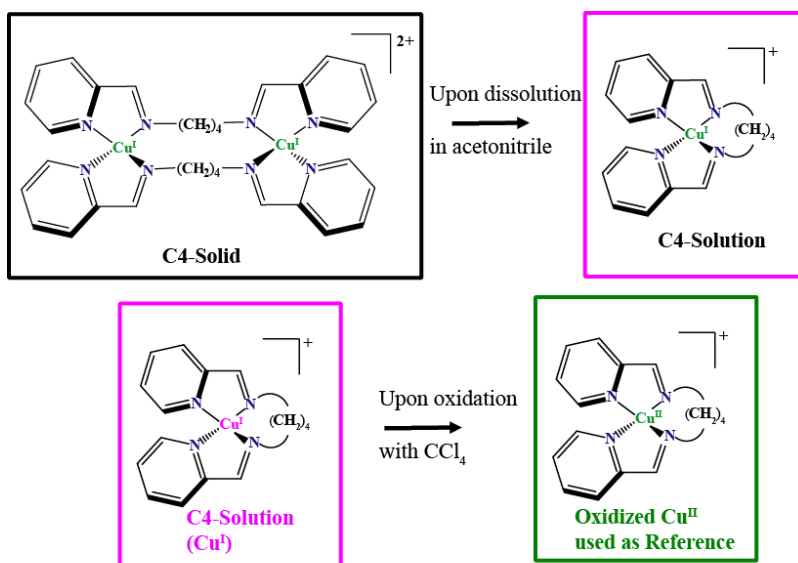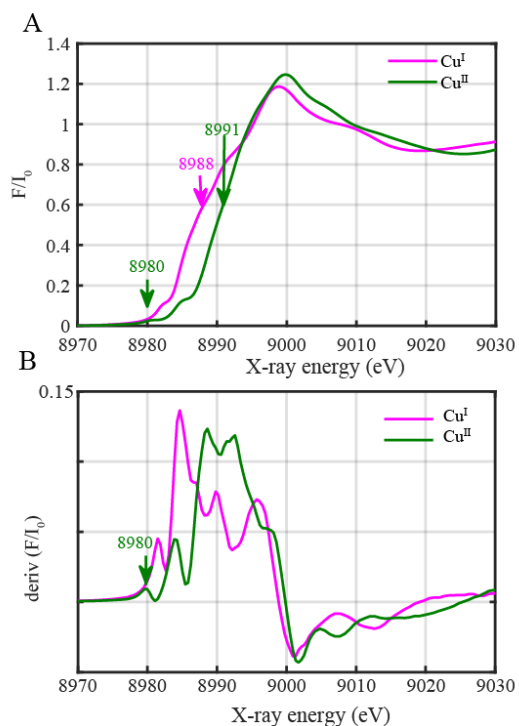

**Figure S14. Top.** General structure of dimeric<sup>4</sup> and monomeric<sup>5, 6</sup> reference  $\text{Cu}^{\text{I}}$  and oxidized  $\text{Cu}^{\text{II}}$  complexes employed for determination of excited state fraction.  $\text{Cu}^{\text{I}}$  was oxidized with  $\text{CCL}_4$  to

generate the oxidized Cu<sup>II</sup> reference complex **Bottom A**. Normalized **B**. Normalized Derivative Cu K-edge XANES of Cu<sup>I</sup> and Cu<sup>II</sup> monomeric reference complexes measured in solution.

The formation of pure Cu<sup>II</sup> in the oxidized reference compound illustrated in Figure S14B is characterized by a 3 eV positive shift from the pure Cu<sup>I</sup> complex at normalized absorption 0.6, reflecting the higher ionization energy required for ejecting a core 1s electron from a more positively charged ion. A clear pre-edge feature at 8980 eV characteristic of Cu<sup>II</sup> formation is also observed in the oxidized reference compound. Previously reported [Cu(dmp)<sub>2</sub>]<sup>+</sup> complexes<sup>7-10</sup> (where dmp = 2,9-dimethyl-1,10,phenanthroline with similar coordination environments show similar relative chemical shift in energy of around 3 eV thus confirming the presence of pure Cu<sup>II</sup> in the reference oxidized complex.

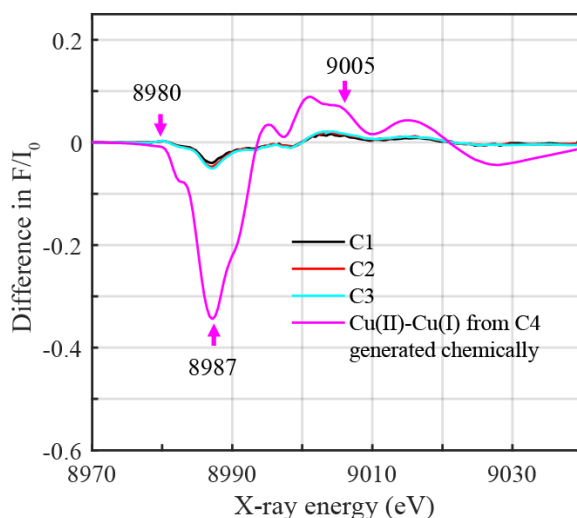

**Figure S15:** Determination of Excited State fraction by comparison with reference monomeric complex<sup>6</sup> chemically oxidized with CCl<sub>4</sub>. The excited state fractions of **C1**, **C2** and **C3** were determined by comparing the negative maximum of the transient signal at 8987 eV with the chemically oxidized Cu(II) derivative of the reference complex. Using this strategy, a proportion of the excited state of 11.6 %, 13.7 % and 14.7 % were determined for **C1**, **C2** and **C3** respectively.

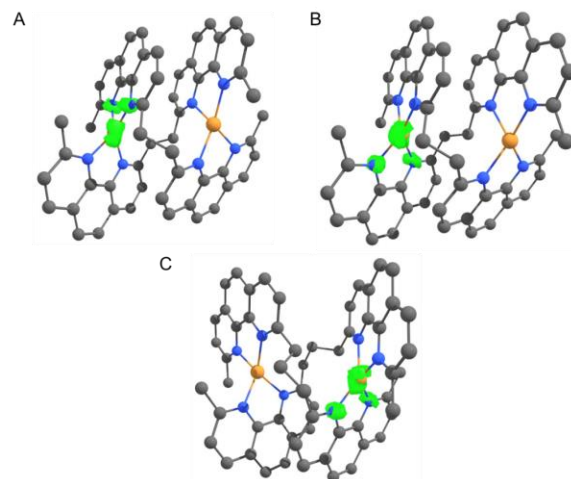

**Figure S16.** Spin density isosurface calculated for the compounds **C1** (A), **C2** (B) and **C3** (C) at the triplet state geometry. Hydrogen atoms are omitted for clarity.

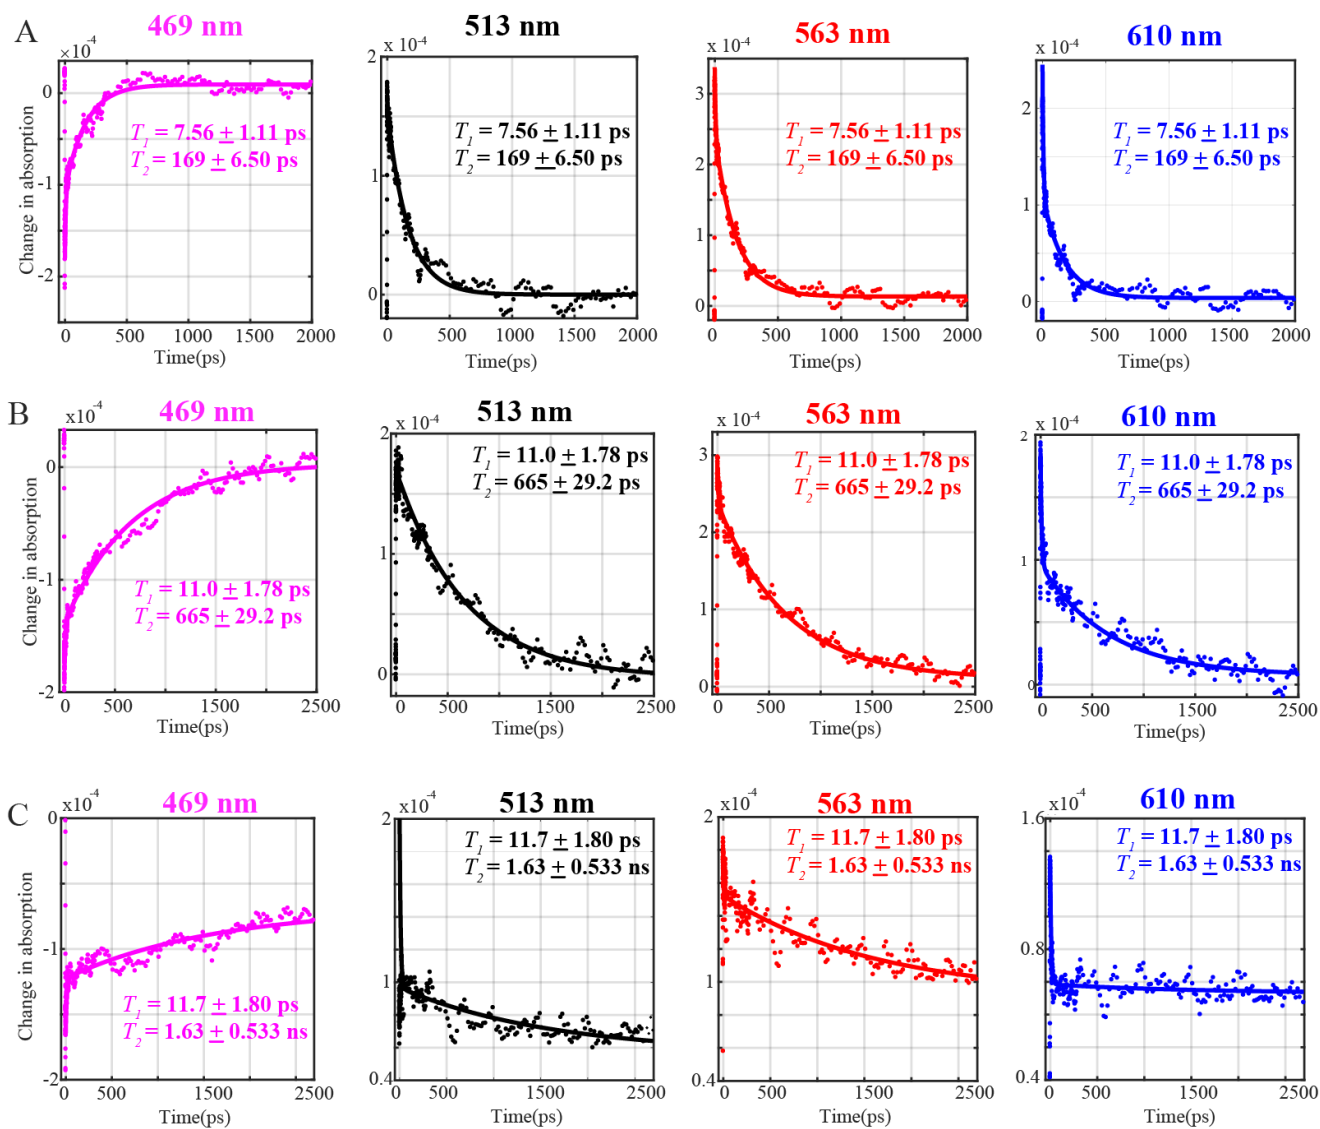

**Figure S17.** Global kinetic decay profiles of the transient absorption spectra at  $\lambda = 469$  nm, 513 nm, 563 nm and 610 nm after excitation at  $\lambda_{\text{exc}} = 410$  nm of **A. C1**, **B. C2** and **C. C3**. The solid lines are fittings to the decay kinetics and  $T_1$  and  $T_2$  are the resulting lifetimes.

## Appendix:

Geometry optimizations were performed by means of Density Functional Theory using the B3LYP<sup>11, 12</sup> functional, Def2-TZVP<sup>13, 14</sup> basis set and the D3BJ<sup>15</sup> dispersion correction. The gas phase calculations were modeled without the polarizable continuum model<sup>16</sup> (PCM). However solvent effects with the PCM model were taken into considerations for comparisons to the ground and excited state structures in solution. The PCM model parameters included water for **C1** and acetonitrile for **C2** and **C3**. The code of each geometry includes the spin multiplicity, where singlets and triplets are models of the ground and excited states, respectively.

Complex **C2** is not included since in gas phase as it is the same in gas phase as in complex **C1**.

### C1/C2-Singlet-gas

|    |           |           |          |
|----|-----------|-----------|----------|
| Cu | 12.054475 | 2.183451  | 3.715154 |
| Cu | 12.144837 | -3.203599 | 5.452892 |
| N  | 13.059579 | 1.363690  | 2.119659 |
| N  | 12.940662 | 3.415058  | 5.128689 |
| N  | 13.108854 | -1.554131 | 6.259863 |
| C  | 10.332298 | 0.358303  | 5.503277 |
| N  | 13.145948 | -4.821690 | 4.614654 |
| N  | 11.213802 | 1.350138  | 5.412661 |
| N  | 11.352493 | -3.291615 | 7.366776 |
| N  | 10.983581 | -3.434211 | 3.759050 |
| C  | 9.867518  | -2.794380 | 3.424279 |
| C  | 12.527380 | 3.102782  | 6.378471 |
| N  | 10.854059 | 2.924633  | 2.191726 |
| C  | 11.308697 | 2.529335  | 0.980211 |
| C  | 12.622898 | -5.142246 | 3.406906 |
| C  | 12.859059 | -1.448129 | 7.586860 |
| C  | 11.885556 | -2.336531 | 8.162333 |
| C  | 11.567934 | 2.041054  | 6.522074 |
| C  | 12.477085 | 1.692164  | 0.942109 |
| C  | 13.137729 | -6.181897 | 2.607343 |
| C  | 11.466083 | -4.414628 | 2.958862 |
| C  | 13.968844 | -0.719475 | 5.682581 |
| C  | 14.169776 | 0.631921  | 2.127219 |
| C  | 12.990238 | 3.780344  | 7.524050 |
| C  | 10.846698 | -4.767983 | 1.742025 |
| C  | 11.521810 | 2.466889  | 8.937641 |
| C  | 11.045320 | 1.748334  | 7.797589 |
| C  | 9.725051  | 0.046570  | 6.731530 |
| C  | 10.065492 | -0.402853 | 4.230839 |
| C  | 14.172046 | -5.517692 | 5.095602 |
| C  | 10.437901 | -4.126149 | 7.853609 |
| C  | 14.768200 | 0.352713  | 3.477014 |

|   |           |           |           |
|---|-----------|-----------|-----------|
| C | 14.094688 | -0.837712 | 4.186448  |
| C | 12.468996 | 3.430011  | 8.809726  |
| C | 11.517941 | -2.180653 | 9.513432  |
| C | 9.785606  | 3.711157  | 2.274957  |
| C | 9.372934  | -1.767637 | 4.403472  |
| C | 10.078999 | 0.731039  | 7.868955  |
| C | 12.509549 | -6.490881 | 1.359937  |
| C | 9.193835  | -3.085610 | 2.226002  |
| C | 14.442950 | 0.342084  | 7.791246  |
| C | 13.487466 | -0.486214 | 8.403338  |
| C | 9.681497  | -4.061819 | 1.389414  |
| C | 13.949773 | 4.790485  | 7.324154  |
| C | 12.991475 | 1.267909  | -0.299690 |
| C | 10.695198 | 2.920602  | -0.225749 |
| C | 12.336460 | 1.671811  | -1.505736 |
| C | 14.249617 | -6.883485 | 3.111078  |
| C | 13.822106 | 4.395629  | 4.949446  |
| C | 14.753906 | -6.559741 | 4.346551  |
| C | 11.236099 | 2.466340  | -1.469248 |
| C | 9.120372  | 4.151223  | 1.113606  |
| C | 11.402912 | -5.820687 | 0.949763  |
| C | 14.740380 | 0.162953  | 0.932299  |
| C | 12.152803 | -1.172666 | 10.306704 |
| C | 10.533032 | -3.054467 | 10.009839 |
| C | 14.679745 | 0.225132  | 6.443135  |
| C | 14.360310 | 5.093577  | 6.048591  |
| C | 13.115102 | -0.375323 | 9.779215  |
| C | 14.154401 | 0.474827  | -0.272460 |
| C | 10.001813 | -4.019358 | 9.188522  |
| C | 9.569925  | 3.761202  | -0.124266 |
| H | 9.254900  | -4.708341 | 9.558173  |
| H | 10.208309 | -2.966664 | 11.039201 |
| H | 11.858649 | -1.068371 | 11.343619 |
| H | 13.606192 | 0.372390  | 10.387775 |
| H | 14.970722 | 1.079650  | 8.382066  |
| H | 15.398113 | 0.871545  | 5.963099  |
| H | 8.257819  | 4.796283  | 1.208535  |
| H | 9.069296  | 4.097480  | -1.023599 |
| H | 10.752910 | 2.780602  | -2.385650 |
| H | 12.743671 | 1.336287  | -2.450825 |
| H | 14.588752 | 0.129143  | -1.202099 |
| H | 15.646707 | -0.425828 | 0.969508  |
| H | 15.084383 | 5.877605  | 5.874966  |
| H | 14.346266 | 5.330458  | 8.174823  |
| H | 12.833646 | 3.965276  | 9.677369  |
| H | 11.114107 | 2.217592  | 9.908350  |

|   |           |           |          |
|---|-----------|-----------|----------|
| H | 9.632502  | 0.479803  | 8.822218 |
| H | 8.991232  | -0.743035 | 6.786084 |
| H | 15.592533 | -7.103046 | 4.758582 |
| H | 14.687139 | -7.683820 | 2.527629 |
| H | 12.924710 | -7.287997 | 0.756828 |
| H | 10.918960 | -6.079270 | 0.016812 |
| H | 9.168203  | -4.306580 | 0.467999 |
| H | 8.286957  | -2.550538 | 1.978866 |
| C | 9.336140  | 4.107840  | 3.647529 |
| H | 8.389041  | 4.643111  | 3.623782 |
| H | 9.230019  | 3.224690  | 4.278792 |
| H | 10.082625 | 4.752598  | 4.118106 |
| C | 14.203019 | 4.724935  | 3.539386 |
| H | 14.751714 | 3.895189  | 3.087243 |
| H | 13.306559 | 4.881413  | 2.937332 |
| H | 14.824675 | 5.616344  | 3.487126 |
| C | 9.895795  | -5.169917 | 6.928238 |
| H | 10.711826 | -5.674579 | 6.410046 |
| H | 9.297822  | -5.906942 | 7.460925 |
| H | 9.269148  | -4.707612 | 6.160731 |
| C | 14.655012 | -5.179959 | 6.473314 |
| H | 13.873415 | -5.401493 | 7.203969 |
| H | 15.542277 | -5.751305 | 6.737902 |
| H | 14.879720 | -4.115008 | 6.556599 |
| H | 15.841527 | 0.184802  | 3.385784 |
| H | 14.618354 | 1.255562  | 4.069362 |
| H | 13.081955 | -0.972073 | 3.804097 |
| H | 14.618058 | -1.767484 | 3.946000 |
| H | 8.290581  | -1.661373 | 4.323724 |
| H | 9.596523  | -2.161814 | 5.394716 |
| H | 11.030136 | -0.536047 | 3.740380 |
| H | 9.485416  | 0.231964  | 3.554621 |

### **C1/C2-triplet-gas**

|    |           |           |          |
|----|-----------|-----------|----------|
| Cu | 11.844802 | 2.462650  | 3.576266 |
| Cu | 12.097619 | -3.509389 | 5.698361 |
| N  | 12.786121 | 1.407389  | 2.058129 |
| N  | 12.842887 | 3.666635  | 4.932312 |
| N  | 12.760464 | -1.742669 | 6.383683 |
| C  | 10.149366 | 0.715721  | 5.468675 |
| N  | 12.963107 | -5.158978 | 4.880218 |
| N  | 11.032301 | 1.693671  | 5.317188 |
| N  | 11.609341 | -3.840807 | 7.586020 |
| N  | 11.323796 | -3.299965 | 3.863307 |
| C  | 10.403034 | -2.424321 | 3.443837 |



|   |           |           |           |
|---|-----------|-----------|-----------|
| C | 12.485152 | 3.376462  | 6.205614  |
| N | 10.778427 | 3.217596  | 1.979717  |
| C | 11.211192 | 2.700406  | 0.805256  |
| C | 12.684950 | -5.222645 | 3.542129  |
| C | 12.681786 | -1.730169 | 7.760259  |
| C | 12.023261 | -2.803720 | 8.385211  |
| C | 11.503027 | 2.347802  | 6.409396  |
| C | 12.273483 | 1.732201  | 0.847599  |
| C | 13.228690 | -6.213163 | 2.700073  |
| C | 11.809672 | -4.243487 | 3.005103  |
| C | 13.438587 | -0.751585 | 5.755306  |
| C | 13.788899 | 0.538847  | 2.140015  |
| C | 13.044822 | 4.034061  | 7.319928  |
| C | 11.453408 | -4.272963 | 1.641191  |
| C | 11.678514 | 2.714683  | 8.827708  |
| C | 11.096493 | 2.026875  | 7.718991  |
| C | 9.664519  | 0.364339  | 6.742775  |
| C | 9.731630  | -0.046775 | 4.238796  |
| C | 13.827984 | -6.028694 | 5.417241  |
| C | 10.922580 | -4.864971 | 8.120403  |
| C | 14.297267 | 0.246011  | 3.524314  |
| C | 13.386397 | -0.752716 | 4.251924  |
| C | 12.617936 | 3.676383  | 8.637079  |
| C | 11.808635 | -2.805814 | 9.784840  |
| C | 9.805636  | 4.123380  | 1.987063  |
| C | 9.739583  | -1.575402 | 4.489165  |
| C | 10.137045 | 1.007061  | 7.858851  |
| C | 12.865946 | -6.220297 | 1.315559  |
| C | 10.021400 | -2.386371 | 2.097646  |
| C | 13.974864 | 0.287914  | 7.875228  |
| C | 13.244422 | -0.694755 | 8.540817  |
| C | 10.554079 | -3.289324 | 1.195546  |
| C | 14.013810 | 5.021961  | 7.057948  |
| C | 12.757370 | 1.172574  | -0.353172 |
| C | 10.669415 | 3.082371  | -0.436857 |
| C | 12.181156 | 1.578266  | -1.597940 |
| C | 14.098333 | -7.144851 | 3.288116  |
| C | 13.748261 | 4.611930  | 4.697664  |
| C | 14.400616 | -7.039616 | 4.630561  |
| C | 11.180777 | 2.495782  | -1.637002 |
| C | 9.213255  | 4.557298  | 0.784369  |
| C | 12.008457 | -5.295938 | 0.809116  |
| C | 14.323451 | -0.067493 | 0.990110  |
| C | 12.322074 | -1.709854 | 10.550632 |
| C | 11.118025 | -3.891469 | 10.326335 |
| C | 14.072239 | 0.243311  | 6.485445  |

|   |           |           |           |
|---|-----------|-----------|-----------|
| C | 14.358994 | 5.308321  | 5.759847  |
| C | 13.029520 | -0.714603 | 9.957690  |
| C | 13.811167 | 0.244927  | -0.247475 |
| C | 10.665719 | -4.906278 | 9.490555  |
| C | 9.640648  | 4.044544  | -0.415483 |
| H | 10.112925 | -5.742462 | 9.894038  |
| H | 10.928801 | -3.936581 | 11.391367 |
| H | 12.151588 | -1.703071 | 11.619868 |
| H | 13.446858 | 0.089736  | 10.549803 |
| H | 14.442231 | 1.087074  | 8.433350  |
| H | 14.619948 | 1.015174  | 5.970342  |
| H | 8.424594  | 5.296444  | 0.818313  |
| H | 9.195104  | 4.375140  | -1.345473 |
| H | 10.754333 | 2.807221  | -2.582176 |
| H | 12.567823 | 1.143752  | -2.511049 |
| H | 14.220214 | -0.205426 | -1.143349 |
| H | 15.145060 | -0.764147 | 1.087475  |
| H | 15.094444 | 6.069798  | 5.539988  |
| H | 14.474038 | 5.552431  | 7.881799  |
| H | 13.057363 | 4.194349  | 9.480179  |
| H | 11.353431 | 2.448066  | 9.825123  |
| H | 9.789281  | 0.726866  | 8.844950  |
| H | 8.934744  | -0.427560 | 6.838956  |
| H | 15.081197 | -7.738164 | 5.095651  |
| H | 14.533276 | -7.932074 | 2.686029  |
| H | 13.283266 | -6.989408 | 0.678463  |
| H | 11.723558 | -5.325886 | -0.234692 |
| H | 10.254873 | -3.266551 | 0.155463  |
| H | 9.288035  | -1.658078 | 1.778560  |
| C | 9.386713  | 4.670734  | 3.316575  |
| H | 8.436648  | 5.198092  | 3.254061  |
| H | 9.305571  | 3.865268  | 4.047282  |
| H | 10.138628 | 5.371618  | 3.689212  |
| C | 14.086069 | 4.897042  | 3.267446  |
| H | 14.576831 | 4.032232  | 2.814350  |
| H | 13.175602 | 5.083313  | 2.695537  |
| H | 14.746092 | 5.756622  | 3.171628  |
| C | 10.422309 | -5.935980 | 7.201624  |
| H | 11.240855 | -6.465412 | 6.713490  |
| H | 9.822378  | -6.662677 | 7.745305  |
| H | 9.805902  | -5.499762 | 6.411351  |
| C | 14.177184 | -5.896259 | 6.867221  |
| H | 13.356703 | -6.224364 | 7.507599  |
| H | 15.047640 | -6.501654 | 7.108926  |
| H | 14.389738 | -4.856895 | 7.121311  |
| H | 15.319415 | -0.131431 | 3.486775  |

|   |           |           |          |
|---|-----------|-----------|----------|
| H | 14.309562 | 1.197107  | 4.054353 |
| H | 12.355657 | -0.537010 | 3.966110 |
| H | 13.590085 | -1.762389 | 3.885131 |
| H | 8.714126  | -1.940325 | 4.597166 |
| H | 10.231372 | -1.779064 | 5.437716 |
| H | 10.412842 | 0.223671  | 3.431876 |
| H | 8.738507  | 0.281954  | 3.922040 |

### C3-singlet-gas

|    |          |           |           |
|----|----------|-----------|-----------|
| Cu | 3.747683 | 5.455341  | 10.187134 |
| Cu | 2.859362 | -0.028242 | 8.495926  |
| N  | 5.253418 | 5.975377  | 8.887639  |
| N  | 5.080997 | 3.915371  | 10.663086 |
| N  | 1.103779 | 0.612677  | 9.342410  |
| N  | 1.564251 | -1.274784 | 7.457131  |
| N  | 2.920964 | 6.528915  | 11.727533 |
| N  | 1.804948 | 5.596916  | 9.434323  |
| N  | 4.294791 | 1.116474  | 7.497988  |
| N  | 4.519147 | -0.736721 | 9.469413  |
| C  | 5.295187 | 6.993968  | 8.033231  |
| C  | 6.407211 | 7.187711  | 7.192014  |
| H  | 6.414334 | 8.024519  | 6.507214  |
| C  | 7.482546 | 6.338936  | 7.271918  |
| H  | 8.357609 | 6.498286  | 6.653999  |
| C  | 7.457768 | 5.267281  | 8.184824  |
| C  | 8.559193 | 4.378360  | 8.377549  |
| H  | 9.456530 | 4.533907  | 7.791711  |
| C  | 8.496596 | 3.383329  | 9.296651  |
| H  | 9.342043 | 2.729241  | 9.460722  |
| C  | 7.316839 | 3.174597  | 10.075866 |
| C  | 7.200387 | 2.147190  | 11.029354 |
| H  | 8.022842 | 1.459842  | 11.177188 |
| C  | 6.054688 | 2.042711  | 11.775914 |
| H  | 5.954212 | 1.271623  | 12.528143 |
| C  | 5.008184 | 2.967707  | 11.596345 |
| C  | 6.210891 | 4.033712  | 9.916845  |
| C  | 6.293871 | 5.113322  | 8.965792  |
| C  | 4.125841 | 7.926535  | 8.002119  |
| H  | 4.379919 | 8.860551  | 7.504488  |
| H  | 3.782037 | 8.139380  | 9.014210  |
| H  | 3.289517 | 7.472295  | 7.465665  |
| C  | 3.803871 | 2.924936  | 12.498619 |
| H  | 3.400759 | 3.935028  | 12.580099 |
| H  | 4.135817 | 2.618608  | 13.493021 |

|   |           |           |           |
|---|-----------|-----------|-----------|
| C | 2.678532  | 1.979138  | 12.052217 |
| H | 3.040662  | 0.947733  | 12.036705 |
| H | 1.885400  | 2.024806  | 12.802140 |
| C | 2.123166  | 2.357825  | 10.678725 |
| H | 1.859514  | 3.416804  | 10.688197 |
| H | 2.905140  | 2.232375  | 9.928233  |
| C | 0.921493  | 1.577991  | 10.236342 |
| C | -0.368568 | 1.902239  | 10.695341 |
| H | -0.488694 | 2.688879  | 11.428425 |
| C | -1.462778 | 1.239722  | 10.195360 |
| H | -2.460531 | 1.492036  | 10.532009 |
| C | -1.287391 | 0.234517  | 9.223374  |
| C | -2.369047 | -0.480159 | 8.619494  |
| H | -3.378506 | -0.249085 | 8.934435  |
| C | -2.137900 | -1.427568 | 7.674045  |
| H | -2.960201 | -1.966394 | 7.220602  |
| C | -0.806717 | -1.736147 | 7.251327  |
| C | -0.505101 | -2.698907 | 6.268276  |
| H | -1.306829 | -3.254872 | 5.799200  |
| C | 0.802785  | -2.920993 | 5.911940  |
| H | 1.051928  | -3.655753 | 5.158631  |
| C | 1.835097  | -2.184555 | 6.526002  |
| C | 0.280875  | -1.048063 | 7.825863  |
| C | 0.035898  | -0.049019 | 8.830960  |
| C | 3.273112  | -2.386401 | 6.159052  |
| H | 3.713293  | -1.446017 | 5.821296  |
| H | 3.388259  | -3.128178 | 5.371337  |
| H | 3.843430  | -2.714502 | 7.031025  |
| C | 3.509849  | 6.975019  | 12.833354 |
| C | 2.766362  | 7.633046  | 13.831598 |
| H | 3.269661  | 7.980481  | 14.723191 |
| C | 1.421496  | 7.844051  | 13.659566 |
| H | 0.841522  | 8.357629  | 14.415698 |
| C | 0.791745  | 7.407469  | 12.478041 |
| C | -0.588283 | 7.639800  | 12.190774 |
| H | -1.189117 | 8.158819  | 12.926610 |
| C | -0.345223 | 6.550567  | 10.039665 |
| C | -0.848223 | 6.138092  | 8.790455  |
| H | -1.876206 | 6.355148  | 8.528286  |
| C | -0.021456 | 5.491222  | 7.907873  |
| H | -0.386373 | 5.190102  | 6.935393  |
| C | 1.316845  | 5.220415  | 8.257384  |
| C | 1.009763  | 6.269828  | 10.307604 |
| C | 1.594786  | 6.732077  | 11.537331 |
| C | 4.983212  | 6.752691  | 12.977741 |
| H | 5.188612  | 5.722840  | 13.281688 |

|   |           |           |           |
|---|-----------|-----------|-----------|
| H | 5.412187  | 7.413831  | 13.727713 |
| H | 5.486273  | 6.916484  | 12.024766 |
| C | 2.229485  | 4.514013  | 7.292980  |
| H | 3.247444  | 4.574010  | 7.678645  |
| H | 2.206139  | 5.047370  | 6.337354  |
| C | 1.840393  | 3.049735  | 7.051644  |
| H | 0.819741  | 2.998144  | 6.665027  |
| H | 1.836606  | 2.508957  | 7.992889  |
| C | 2.756588  | 2.324989  | 6.055664  |
| H | 2.295028  | 1.364776  | 5.809683  |
| H | 2.816539  | 2.896309  | 5.127688  |
| C | 4.151845  | 2.032311  | 6.543191  |
| C | 5.274654  | 2.650967  | 5.959091  |
| H | 5.127144  | 3.408723  | 5.201918  |
| C | 6.540977  | 2.257974  | 6.317636  |
| H | 7.411756  | 2.702792  | 5.854065  |
| C | 6.707387  | 1.251831  | 7.285382  |
| C | 7.984987  | 0.741660  | 7.674976  |
| H | 8.865476  | 1.130891  | 7.181283  |
| C | 8.093697  | -0.203418 | 8.641646  |
| H | 9.063204  | -0.585305 | 8.936498  |
| C | 6.932470  | -0.717657 | 9.298253  |
| C | 6.985561  | -1.665969 | 10.336487 |
| H | 7.944495  | -2.038707 | 10.674985 |
| C | 5.820677  | -2.113014 | 10.911258 |
| H | 5.843337  | -2.842498 | 11.709098 |
| C | 4.580357  | -1.638327 | 10.444626 |
| C | 5.656768  | -0.263611 | 8.910599  |
| C | 5.538814  | 0.734741  | 7.880334  |
| C | 3.285929  | -2.143133 | 11.000162 |
| H | 2.594731  | -1.317031 | 11.169535 |
| H | 3.432546  | -2.688313 | 11.930721 |
| H | 2.809192  | -2.817691 | 10.284038 |
| C | -1.132512 | 7.240848  | 11.012840 |
| H | -2.171288 | 7.446149  | 10.788734 |

### **C3-triplet-gas**

|    |          |           |           |
|----|----------|-----------|-----------|
| Cu | 3.759043 | 5.332907  | 10.100052 |
| Cu | 2.846890 | 0.126139  | 8.557015  |
| N  | 5.099467 | 5.790852  | 8.700640  |
| N  | 5.099297 | 3.972856  | 10.686613 |
| N  | 1.078496 | 0.793424  | 9.360587  |
| N  | 1.560209 | -1.122216 | 7.504744  |
| N  | 2.963127 | 6.168614  | 11.750203 |
| N  | 1.906969 | 5.610072  | 9.345741  |

|   |           |           |           |
|---|-----------|-----------|-----------|
| N | 4.307408  | 1.205366  | 7.517091  |
| N | 4.491842  | -0.597051 | 9.542081  |
| C | 5.101630  | 6.800623  | 7.808357  |
| C | 6.220327  | 7.046430  | 7.015811  |
| H | 6.188423  | 7.863456  | 6.309199  |
| C | 7.365853  | 6.270512  | 7.145478  |
| H | 8.237805  | 6.474139  | 6.537273  |
| C | 7.401416  | 5.252529  | 8.100293  |
| C | 8.554218  | 4.447086  | 8.363398  |
| H | 9.451064  | 4.630460  | 7.784912  |
| C | 8.535626  | 3.492183  | 9.326245  |
| H | 9.414994  | 2.895397  | 9.527326  |
| C | 7.366325  | 3.257479  | 10.117697 |
| C | 7.289248  | 2.287264  | 11.116511 |
| H | 8.139854  | 1.651549  | 11.319956 |
| C | 6.118684  | 2.161977  | 11.855855 |
| H | 6.042471  | 1.417892  | 12.636625 |
| C | 5.047995  | 3.027942  | 11.649670 |
| C | 6.227245  | 4.067107  | 9.896835  |
| C | 6.238165  | 5.039714  | 8.878397  |
| C | 3.887249  | 7.667498  | 7.696434  |
| H | 4.124503  | 8.581440  | 7.156676  |
| H | 3.505734  | 7.934114  | 8.682698  |
| H | 3.080809  | 7.163934  | 7.161760  |
| C | 3.832701  | 2.905154  | 12.531091 |
| H | 3.398802  | 3.886364  | 12.713668 |
| H | 4.162135  | 2.520069  | 13.496935 |
| C | 2.732576  | 1.973762  | 11.994398 |
| H | 3.148886  | 0.985838  | 11.789840 |
| H | 1.982146  | 1.852109  | 12.778683 |
| C | 2.067859  | 2.531233  | 10.735157 |
| H | 1.743926  | 3.550993  | 10.942551 |
| H | 2.804858  | 2.567130  | 9.931118  |
| C | 0.877300  | 1.761653  | 10.248049 |
| C | -0.419263 | 2.095983  | 10.677441 |
| H | -0.549060 | 2.888252  | 11.402733 |
| C | -1.506651 | 1.436088  | 10.159214 |
| H | -2.510012 | 1.693644  | 10.474569 |
| C | -1.314308 | 0.426062  | 9.197004  |
| C | -2.388924 | -0.286236 | 8.577848  |
| H | -3.402270 | -0.048600 | 8.874853  |
| C | -2.146311 | -1.237772 | 7.640080  |
| H | -2.963112 | -1.774069 | 7.173912  |
| C | -0.809174 | -1.556337 | 7.245200  |
| C | -0.495526 | -2.528456 | 6.275183  |
| H | -1.292570 | -3.078689 | 5.791678  |

|   |           |           |           |
|---|-----------|-----------|-----------|
| C | 0.817559  | -2.771003 | 5.953983  |
| H | 1.075845  | -3.516740 | 5.214642  |
| C | 1.843605  | -2.045224 | 6.590966  |
| C | 0.272102  | -0.874382 | 7.838584  |
| C | 0.016134  | 0.134624  | 8.831248  |
| C | 3.287496  | -2.269783 | 6.264382  |
| H | 3.705354  | -1.387052 | 5.774268  |
| H | 3.423420  | -3.124074 | 5.604385  |
| H | 3.862341  | -2.431623 | 7.177144  |
| C | 3.570733  | 6.537311  | 12.886223 |
| C | 2.839197  | 7.150209  | 13.911892 |
| H | 3.351807  | 7.431848  | 14.820838 |
| C | 1.487495  | 7.389747  | 13.766486 |
| H | 0.920212  | 7.848081  | 14.565999 |
| C | 0.851492  | 7.064042  | 12.558475 |
| C | -0.527286 | 7.324480  | 12.284471 |
| H | -1.129547 | 7.782420  | 13.058447 |
| C | -0.281764 | 6.425433  | 10.043040 |
| C | -0.773516 | 6.110427  | 8.766791  |
| H | -1.803038 | 6.331131  | 8.515975  |
| C | 0.067689  | 5.530041  | 7.839415  |
| H | -0.296496 | 5.277379  | 6.853566  |
| C | 1.409073  | 5.269091  | 8.151319  |
| C | 1.079155  | 6.153142  | 10.294070 |
| C | 1.641372  | 6.459385  | 11.559183 |
| C | 5.038001  | 6.285973  | 13.041708 |
| H | 5.231805  | 5.266244  | 13.382909 |
| H | 5.462126  | 6.964527  | 13.778652 |
| H | 5.562125  | 6.418697  | 12.096297 |
| C | 2.289408  | 4.568194  | 7.155782  |
| H | 3.322718  | 4.611940  | 7.491258  |
| H | 2.234916  | 5.089408  | 6.196245  |
| C | 1.875325  | 3.103391  | 6.952436  |
| H | 0.857590  | 3.056351  | 6.559176  |
| H | 1.857824  | 2.587962  | 7.908458  |
| C | 2.799547  | 2.346457  | 5.990946  |
| H | 2.338435  | 1.380752  | 5.767588  |
| H | 2.875925  | 2.889386  | 5.047342  |
| C | 4.185441  | 2.071644  | 6.514503  |
| C | 5.318738  | 2.659857  | 5.920921  |
| H | 5.187169  | 3.381009  | 5.125933  |
| C | 6.577151  | 2.283930  | 6.322135  |
| H | 7.457065  | 2.708716  | 5.857230  |
| C | 6.723334  | 1.320739  | 7.335592  |
| C | 7.992248  | 0.820825  | 7.762753  |
| H | 8.881466  | 1.191421  | 7.270748  |

|   |           |           |           |
|---|-----------|-----------|-----------|
| C | 8.081597  | -0.091766 | 8.761714  |
| H | 9.044538  | -0.467581 | 9.084281  |
| C | 6.908058  | -0.583245 | 9.413337  |
| C | 6.941516  | -1.511480 | 10.470224 |
| H | 7.894254  | -1.875452 | 10.834663 |
| C | 5.766256  | -1.954419 | 11.026049 |
| H | 5.773872  | -2.673246 | 11.833835 |
| C | 4.534873  | -1.491365 | 10.525559 |
| C | 5.640337  | -0.134597 | 8.995013  |
| C | 5.543118  | 0.833120  | 7.933770  |
| C | 3.231811  | -2.010394 | 11.048611 |
| H | 2.506490  | -1.202525 | 11.147049 |
| H | 3.353652  | -2.507819 | 12.009209 |
| H | 2.810412  | -2.735232 | 10.346528 |
| C | -1.071339 | 7.017260  | 11.078061 |
| H | -2.112675 | 7.231033  | 10.874607 |

### **C1-Singlet-PCM**

|    |           |           |          |
|----|-----------|-----------|----------|
| Cu | 11.975318 | 1.834274  | 3.703523 |
| Cu | 11.737265 | -2.946092 | 5.534428 |
| N  | 12.846902 | 1.074056  | 2.010265 |
| N  | 13.035833 | 2.787660  | 5.188501 |
| N  | 13.088689 | -1.460686 | 6.177447 |
| C  | 9.954910  | 0.185497  | 5.330571 |
| N  | 13.110802 | -4.420390 | 4.834372 |
| N  | 10.997918 | 1.005875  | 5.320936 |
| N  | 11.104818 | -2.763907 | 7.476000 |
| N  | 10.978826 | -3.230155 | 3.659998 |
| C  | 9.884020  | -2.697233 | 3.125225 |
| C  | 12.546401 | 2.467106  | 6.412013 |
| N  | 10.684064 | 2.678007  | 2.303397 |
| C  | 11.006178 | 2.272238  | 1.053540 |
| C  | 12.941896 | -4.600324 | 3.505696 |
| C  | 13.025301 | -1.329918 | 7.519182 |
| C  | 11.935814 | -1.972715 | 8.202063 |
| C  | 11.430379 | 1.566570  | 6.476678 |
| C  | 12.155012 | 1.419795  | 0.897722 |
| C  | 13.839745 | -5.351419 | 2.720676 |
| C  | 11.788542 | -4.002712 | 2.889085 |
| C  | 14.057814 | -0.867544 | 5.492950 |
| C  | 13.957642 | 0.350586  | 1.898957 |



|   |           |           |           |
|---|-----------|-----------|-----------|
| C | 13.077803 | 2.999054  | 7.602604  |
| C | 11.535728 | -4.239116 | 1.523312  |
| C | 11.365152 | 1.883812  | 8.905649  |
| C | 10.827770 | 1.295886  | 7.720157  |
| C | 9.281778  | -0.112982 | 6.533453  |
| C | 9.505317  | -0.357495 | 4.002971  |
| C | 14.161648 | -4.952348 | 5.445998  |
| C | 10.048842 | -3.318019 | 8.063501  |
| C | 14.700221 | 0.053136  | 3.170484  |
| C | 13.996361 | -1.036580 | 3.999681  |
| C | 12.458830 | 2.686885  | 8.851505  |
| C | 11.759732 | -1.743782 | 9.579524  |
| C | 9.633017  | 3.468463  | 2.494336  |
| C | 9.032517  | -1.835227 | 4.006914  |
| C | 9.713742  | 0.433631  | 7.714348  |
| C | 13.572236 | -5.543824 | 1.330221  |
| C | 9.551072  | -2.908857 | 1.774041  |
| C | 15.005515 | 0.023971  | 7.518570  |
| C | 13.958945 | -0.568614 | 8.250506  |
| C | 10.369176 | -3.670783 | 0.976600  |
| C | 14.204427 | 3.835673  | 7.483382  |
| C | 12.538212 | 0.999420  | -0.391899 |
| C | 10.275962 | 2.669733  | -0.084312 |
| C | 11.765458 | 1.407843  | -1.525205 |
| C | 14.965709 | -5.886907 | 3.376262  |
| C | 14.078719 | 3.604801  | 5.087358  |
| C | 15.123049 | -5.690343 | 4.725704  |
| C | 10.680978 | 2.212441  | -1.377663 |
| C | 8.857830  | 3.915973  | 1.406058  |
| C | 12.455315 | -5.024370 | 0.758005  |
| C | 14.404804 | -0.105887 | 0.647892  |
| C | 12.716794 | -0.956273 | 10.294356 |
| C | 10.620465 | -2.314390 | 10.181116 |
| C | 15.054292 | -0.122782 | 6.152337  |
| C | 14.702301 | 4.129047  | 6.238357  |
| C | 13.786522 | -0.410342 | 9.660304  |
| C | 13.695961 | 0.204232  | -0.488940 |
| C | 9.773327  | -3.086726 | 9.426339  |
| C | 9.177395  | 3.524674  | 0.128360  |
| H | 8.895685  | -3.537991 | 9.868218  |

|   |           |           |           |
|---|-----------|-----------|-----------|
| H | 10.421245 | -2.135305 | 11.230503 |
| H | 12.562990 | -0.796555 | 11.354186 |
| H | 14.507031 | 0.185877  | 10.205387 |
| H | 15.755350 | 0.607554  | 8.037364  |
| H | 15.844639 | 0.343626  | 5.583008  |
| H | 8.016111  | 4.569439  | 1.589936  |
| H | 8.595411  | 3.868147  | -0.717574 |
| H | 10.105623 | 2.530887  | -2.237975 |
| H | 12.073053 | 1.064782  | -2.504781 |
| H | 14.029406 | -0.143172 | -1.458582 |
| H | 15.309653 | -0.694548 | 0.592543  |
| H | 15.559706 | 4.777939  | 6.124260  |
| H | 14.659454 | 4.248368  | 8.374944  |
| H | 12.882502 | 3.107304  | 9.754601  |
| H | 10.896088 | 1.650624  | 9.852292  |
| H | 9.215625  | 0.198560  | 8.646006  |
| H | 8.429946  | -0.777778 | 6.521552  |
| H | 15.973251 | -6.103983 | 5.250352  |
| H | 15.691080 | -6.457122 | 2.809842  |
| H | 14.275897 | -6.122201 | 0.744691  |
| H | 12.243100 | -5.189895 | -0.290550 |
| H | 10.124701 | -3.846846 | -0.063505 |
| H | 8.649989  | -2.461329 | 1.378487  |
| C | 9.304165  | 3.846844  | 3.905026  |
| H | 8.546844  | 4.627848  | 3.942515  |
| H | 8.926939  | 2.975564  | 4.446453  |
| H | 10.200460 | 4.189014  | 4.424946  |
| C | 14.566981 | 3.946627  | 3.713442  |
| H | 15.272076 | 3.188893  | 3.359138  |
| H | 13.732541 | 3.975352  | 3.013440  |
| H | 15.084039 | 4.905223  | 3.707239  |
| C | 9.140884  | -4.167953 | 7.230637  |
| H | 9.685271  | -4.609226 | 6.396525  |
| H | 8.683623  | -4.955575 | 7.828709  |
| H | 8.331749  | -3.557008 | 6.820231  |
| C | 14.291061 | -4.733687 | 6.920155  |
| H | 13.312519 | -4.784730 | 7.396712  |
| H | 14.954048 | -5.469320 | 7.371152  |
| H | 14.703090 | -3.741110 | 7.120358  |
| H | 15.724406 | -0.238713 | 2.944135  |

|   |           |           |          |
|---|-----------|-----------|----------|
| H | 14.739302 | 0.978131  | 3.745251 |
| H | 12.937828 | -1.071677 | 3.741771 |
| H | 14.404904 | -2.016437 | 3.738646 |
| H | 7.996819  | -1.892917 | 3.676996 |
| H | 9.077235  | -2.242135 | 5.015255 |
| H | 10.327306 | -0.221409 | 3.300217 |
| H | 8.691190  | 0.273793  | 3.636691 |

### **C1-triplet-PCM**

|    |           |           |          |
|----|-----------|-----------|----------|
| Cu | 11.786048 | 1.668497  | 3.695946 |
| Cu | 11.600611 | -2.913841 | 5.641541 |
| N  | 12.829621 | 0.938531  | 2.111312 |
| N  | 13.043370 | 2.560477  | 4.925606 |
| N  | 13.121465 | -1.536868 | 6.331676 |
| C  | 9.735960  | 0.362707  | 5.515908 |
| N  | 12.920113 | -4.378895 | 4.797930 |
| N  | 10.833107 | 1.122549  | 5.341963 |
| N  | 11.043611 | -2.759985 | 7.581510 |
| N  | 11.028757 | -2.803254 | 3.672909 |
| C  | 10.066569 | -2.053043 | 3.146645 |
| C  | 12.656967 | 2.358066  | 6.236003 |
| N  | 10.453828 | 2.194445  | 2.247691 |
| C  | 10.885193 | 1.790454  | 1.023632 |
| C  | 12.976875 | -4.186159 | 3.460902 |
| C  | 13.052452 | -1.447698 | 7.675978 |
| C  | 11.924173 | -2.052209 | 8.333909 |
| C  | 11.522989 | 1.575444  | 6.456885 |
| C  | 12.131719 | 1.098653  | 0.956559 |
| C  | 13.991779 | -4.740784 | 2.655546 |
| C  | 11.975739 | -3.345088 | 2.861340 |
| C  | 14.128631 | -0.971204 | 5.680317 |
| C  | 13.991218 | 0.281338  | 2.102540 |
| C  | 13.354521 | 2.950270  | 7.319635 |
| C  | 12.025167 | -3.088730 | 1.477246 |
| C  | 11.813705 | 1.872977  | 8.865066 |
| C  | 11.080779 | 1.297652  | 7.776398 |
| C  | 9.293891  | 0.024199  | 6.790521 |
| C  | 8.933252  | -0.069734 | 4.319744 |
| C  | 13.841307 | -5.121147 | 5.397943 |

|   |           |           |           |
|---|-----------|-----------|-----------|
| C | 9.958048  | -3.274075 | 8.154481  |
| C | 14.707762 | 0.081588  | 3.405103  |
| C | 14.089443 | -1.094295 | 4.184004  |
| C | 12.891125 | 2.669272  | 8.647393  |
| C | 11.764767 | -1.873910 | 9.722079  |
| C | 9.342130  | 2.919710  | 2.362163  |
| C | 8.951422  | -1.588180 | 4.034086  |
| C | 9.952975  | 0.497727  | 7.925751  |
| C | 14.012807 | -4.461595 | 1.253504  |
| C | 10.056908 | -1.741818 | 1.769919  |
| C | 15.092260 | -0.180043 | 7.733848  |
| C | 14.016403 | -0.754708 | 8.436288  |
| C | 11.029526 | -2.244712 | 0.944890  |
| C | 14.424717 | 3.787700  | 7.020742  |
| C | 12.599972 | 0.620763  | -0.280784 |
| C | 10.161470 | 2.045258  | -0.153013 |
| C | 11.826539 | 0.859594  | -1.459086 |
| C | 14.960765 | -5.531818 | 3.303813  |
| C | 14.051842 | 3.421661  | 4.652415  |
| C | 14.886981 | -5.716743 | 4.662355  |
| C | 10.661215 | 1.556329  | -1.399230 |
| C | 8.582544  | 3.234483  | 1.218481  |
| C | 13.068964 | -3.665335 | 0.688056  |
| C | 14.504599 | -0.243419 | 0.905978  |
| C | 12.757564 | -1.160701 | 10.465086 |
| C | 10.603716 | -2.409803 | 10.309392 |
| C | 15.149969 | -0.288748 | 6.365369  |
| C | 14.752140 | 4.036458  | 5.679181  |
| C | 13.849119 | -0.637813 | 9.850395  |
| C | 13.825081 | -0.070402 | -0.276602 |
| C | 9.707276  | -3.095329 | 9.527693  |
| C | 8.972669  | 2.790103  | -0.020434 |
| H | 8.807552  | -3.514959 | 9.955819  |
| H | 10.423360 | -2.268827 | 11.367956 |
| H | 12.612908 | -1.040906 | 11.531470 |
| H | 14.595841 | -0.095011 | 10.415483 |
| H | 15.856708 | 0.359274  | 8.278263  |
| H | 15.961367 | 0.161477  | 5.812151  |
| H | 7.685497  | 3.825457  | 1.337503  |
| H | 8.386080  | 3.020410  | -0.900497 |

|   |           |           |           |
|---|-----------|-----------|-----------|
| H | 10.089512 | 1.757338  | -2.295903 |
| H | 12.198381 | 0.480065  | -2.401718 |
| H | 14.224136 | -0.459977 | -1.204106 |
| H | 15.446979 | -0.770817 | 0.931759  |
| H | 15.556403 | 4.713616  | 5.427106  |
| H | 14.980840 | 4.259092  | 7.820410  |
| H | 13.428256 | 3.108033  | 9.479369  |
| H | 11.481811 | 1.658868  | 9.872428  |
| H | 9.586319  | 0.256773  | 8.914494  |
| H | 8.405803  | -0.583537 | 6.887851  |
| H | 15.622293 | -6.316227 | 5.180555  |
| H | 15.757887 | -5.981571 | 2.725388  |
| H | 14.804274 | -4.892761 | 0.653738  |
| H | 13.095714 | -3.446850 | -0.371824 |
| H | 11.031211 | -2.015562 | -0.112977 |
| H | 9.267809  | -1.115957 | 1.374912  |
| C | 8.909246  | 3.379362  | 3.716748  |
| H | 8.424785  | 4.352276  | 3.646272  |
| H | 8.180852  | 2.682531  | 4.139357  |
| H | 9.751739  | 3.443619  | 4.401409  |
| C | 14.380507 | 3.681562  | 3.214481  |
| H | 14.943072 | 2.853929  | 2.777264  |
| H | 13.470562 | 3.805379  | 2.624460  |
| H | 14.986210 | 4.580485  | 3.117308  |
| C | 8.993950  | -4.016347 | 7.285903  |
| H | 9.522590  | -4.576126 | 6.514398  |
| H | 8.376505  | -4.694956 | 7.873302  |
| H | 8.326474  | -3.310638 | 6.783936  |
| C | 13.739061 | -5.280300 | 6.882273  |
| H | 12.705533 | -5.469796 | 7.173536  |
| H | 14.371753 | -6.090605 | 7.239196  |
| H | 14.055168 | -4.359280 | 7.379669  |
| H | 15.764670 | -0.095800 | 3.216335  |
| H | 14.621494 | 0.986402  | 3.997067  |
| H | 13.041264 | -1.201168 | 3.915125  |
| H | 14.578582 | -2.023043 | 3.883282  |
| H | 8.012816  | -1.845873 | 3.538455  |
| H | 8.991819  | -2.143721 | 4.968085  |
| H | 9.260322  | 0.463977  | 3.433012  |
| H | 7.897774  | 0.219237  | 4.501638  |

## C2-singlet-PCM

|    |           |           |          |
|----|-----------|-----------|----------|
| Cu | 11.974796 | 1.834789  | 3.703230 |
| Cu | 11.737713 | -2.946718 | 5.534574 |
| N  | 12.846514 | 1.074807  | 2.009900 |
| N  | 13.035448 | 2.787910  | 5.188356 |
| N  | 13.088784 | -1.460708 | 6.177236 |
| C  | 9.954787  | 0.185345  | 5.330109 |
| N  | 13.111081 | -4.421238 | 4.834844 |
| N  | 10.997699 | 1.005855  | 5.320554 |
| N  | 11.105322 | -2.764287 | 7.476142 |
| N  | 10.979241 | -3.231051 | 3.660115 |
| C  | 9.884483  | -2.698188 | 3.125226 |
| C  | 12.546034 | 2.467167  | 6.411821 |
| N  | 10.683976 | 2.679194  | 2.303202 |
| C  | 11.006186 | 2.273717  | 1.053267 |
| C  | 12.941965 | -4.601806 | 3.506280 |
| C  | 13.025487 | -1.329841 | 7.518976 |
| C  | 11.936188 | -1.972794 | 8.202029 |
| C  | 11.430094 | 1.566486  | 6.476362 |
| C  | 12.154815 | 1.421004  | 0.897369 |
| C  | 13.839377 | -5.353743 | 2.721570 |
| C  | 11.788730 | -4.004147 | 2.889489 |
| C  | 14.057684 | -0.867355 | 5.492602 |
| C  | 13.957221 | 0.351318  | 1.898531 |
| C  | 13.077208 | 2.999214  | 7.602476 |
| C  | 11.535653 | -4.241241 | 1.523870 |
| C  | 11.364646 | 1.883655  | 8.905352 |
| C  | 10.827425 | 1.295713  | 7.719805 |
| C  | 9.281468  | -0.113044 | 6.532906 |
| C  | 9.505482  | -0.358011 | 4.002519 |
| C  | 14.161628 | -4.953549 | 5.446677 |
| C  | 10.049660 | -3.318788 | 8.063874 |
| C  | 14.699688 | 0.053679  | 3.170143 |
| C  | 13.995971 | -1.036206 | 3.999283 |
| C  | 12.458179 | 2.686905  | 8.851313 |
| C  | 11.760273 | -1.743879 | 9.579520 |
| C  | 9.633400  | 3.470289  | 2.494144 |
| C  | 9.033057  | -1.835902 | 4.006784 |
| C  | 9.713337  | 0.433555  | 7.713846 |
| C  | 13.571569 | -5.546894 | 1.331281 |
| C  | 9.551315  | -2.910406 | 1.774205 |
| C  | 15.005560 | 0.024233  | 7.518133 |
| C  | 13.959102 | -0.568367 | 8.250189 |
| C  | 10.369148 | -3.672934 | 0.977056 |
| C  | 14.203506 | 3.836284  | 7.483343 |

|   |           |           |           |
|---|-----------|-----------|-----------|
| C | 12.538204 | 1.001063  | -0.392349 |
| C | 10.276396 | 2.671909  | -0.084613 |
| C | 11.765776 | 1.410077  | -1.525653 |
| C | 14.965098 | -5.889506 | 3.377350  |
| C | 14.078010 | 3.605494  | 5.087301  |
| C | 15.122609 | -5.692384 | 4.726679  |
| C | 10.681525 | 2.214933  | -1.378034 |
| C | 8.858675  | 3.918517  | 1.405839  |
| C | 12.454815 | -5.027311 | 0.758902  |
| C | 14.404579 | -0.104708 | 0.647388  |
| C | 12.717324 | -0.956236 | 10.294210 |
| C | 10.621310 | -2.314854 | 10.181337 |
| C | 15.054166 | -0.122512 | 6.151892  |
| C | 14.701327 | 4.129922  | 6.238367  |
| C | 13.786866 | -0.410147 | 9.660016  |
| C | 13.695925 | 0.205860  | -0.489450 |
| C | 9.774299  | -3.087508 | 9.426750  |
| C | 9.178239  | 3.527364  | 0.128107  |
| H | 8.897019  | -3.539230 | 9.868888  |
| H | 10.422316 | -2.136009 | 11.230813 |
| H | 12.563870 | -0.796814 | 11.354137 |
| H | 14.507505 | 0.185920  | 10.205093 |
| H | 15.755482 | 0.607782  | 8.036846  |
| H | 15.844424 | 0.343953  | 5.582477  |
| H | 8.017383  | 4.572540  | 1.589687  |
| H | 8.596637  | 3.871472  | -0.717828 |
| H | 10.106537 | 2.533932  | -2.238377 |
| H | 12.073507 | 1.067431  | -2.505326 |
| H | 14.029626 | -0.141073 | -1.459175 |
| H | 15.309535 | -0.693201 | 0.591887  |
| H | 15.558346 | 4.779346  | 6.124369  |
| H | 14.658207 | 4.249330  | 8.374914  |
| H | 12.881488 | 3.107617  | 9.754442  |
| H | 10.895423 | 1.650587  | 9.851944  |
| H | 9.215063  | 0.198557  | 8.645443  |
| H | 8.429520  | -0.777716 | 6.520900  |
| H | 15.972527 | -6.106399 | 5.251492  |
| H | 15.690066 | -6.460517 | 2.811219  |
| H | 14.274770 | -6.126088 | 0.746016  |
| H | 12.242323 | -5.193591 | -0.289472 |
| H | 10.124366 | -3.849643 | -0.062870 |
| H | 8.650178  | -2.463079 | 1.378538  |
| C | 9.304683  | 3.848767  | 3.904858  |
| H | 8.547846  | 4.630230  | 3.942422  |
| H | 8.926949  | 2.977714  | 4.446303  |
| H | 10.201139 | 4.190440  | 4.424820  |

|   |           |           |          |
|---|-----------|-----------|----------|
| C | 14.566058 | 3.947787  | 3.713412 |
| H | 15.271453 | 3.190458  | 3.358828 |
| H | 13.731571 | 3.976335  | 3.013469 |
| H | 15.082701 | 4.906602  | 3.707284 |
| C | 9.142029  | -4.169356 | 7.231283 |
| H | 9.686542  | -4.610375 | 6.397123 |
| H | 8.685397  | -4.957267 | 7.829450 |
| H | 8.332406  | -3.559064 | 6.820882 |
| C | 14.291049 | -4.734545 | 6.920789 |
| H | 13.312440 | -4.784908 | 7.397260 |
| H | 14.953485 | -5.470460 | 7.372124 |
| H | 14.703638 | -3.742166 | 7.120838 |
| H | 15.723970 | -0.237942 | 2.943829 |
| H | 14.738534 | 0.978613  | 3.745041 |
| H | 12.937401 | -1.071208 | 3.741530 |
| H | 14.404346 | -2.016082 | 3.738008 |
| H | 7.997296  | -1.893936 | 3.677048 |
| H | 9.077981  | -2.242546 | 5.015226 |
| H | 10.327492 | -0.221869 | 3.299806 |
| H | 8.691258  | 0.273043  | 3.636025 |

### **C2-triplet-PCM**

|    |           |          |           |
|----|-----------|----------|-----------|
| Cu | 6.078019  | 4.181137 | 8.969419  |
| Cu | 6.031085  | 3.835172 | 14.080227 |
| N  | 7.389675  | 2.976245 | 8.117679  |
| N  | 7.636843  | 5.332849 | 9.343989  |
| N  | 4.575985  | 3.136751 | 9.888091  |
| N  | 4.554782  | 5.399607 | 8.418269  |
| C  | 5.777083  | 1.414817 | 7.157922  |
| C  | 7.188084  | 1.876533 | 7.359241  |
| C  | 8.260235  | 1.211161 | 6.780422  |
| C  | 9.571574  | 1.671881 | 6.964070  |
| C  | 9.790311  | 2.847973 | 7.674037  |
| C  | 8.660558  | 3.506750 | 8.222906  |
| C  | 11.077290 | 3.450435 | 7.875108  |
| C  | 11.209345 | 4.627807 | 8.538639  |
| C  | 10.067233 | 5.328940 | 9.053852  |
| C  | 10.129172 | 6.546364 | 9.719830  |
| C  | 8.948295  | 7.131936 | 10.197120 |
| C  | 7.725663  | 6.511854 | 10.002566 |
| C  | 8.791988  | 4.731951 | 8.879889  |
| C  | 5.879481  | 1.212914 | 10.693173 |
| C  | 4.631336  | 2.042150 | 10.644405 |
| C  | 3.491936  | 1.597615 | 11.346955 |
| C  | 2.290372  | 2.237086 | 11.199628 |



|   |           |          |           |
|---|-----------|----------|-----------|
| C | 2.204896  | 3.369408 | 10.365200 |
| C | 3.394050  | 3.805914 | 9.757035  |
| C | 0.987036  | 4.070123 | 10.112175 |
| C | 0.965343  | 5.163135 | 9.305160  |
| C | 2.165155  | 5.652664 | 8.707021  |
| C | 2.219733  | 6.791165 | 7.878906  |
| C | 3.417843  | 7.181753 | 7.335608  |
| C | 4.596252  | 6.462540 | 7.615890  |
| C | 3.376267  | 4.980501 | 8.944769  |
| C | 5.906364  | 6.887079 | 7.035931  |
| C | 6.467297  | 7.068677 | 10.604777 |
| H | 5.118539  | 2.262510 | 6.959961  |
| H | 5.718608  | 0.723474 | 6.319267  |
| H | 5.391327  | 0.899783 | 8.038978  |
| H | 8.066755  | 0.327927 | 6.188251  |
| H | 10.407869 | 1.138050 | 6.531682  |
| H | 11.947492 | 2.942617 | 7.477546  |
| H | 12.188013 | 5.066393 | 8.688368  |
| H | 11.084424 | 7.029223 | 9.876443  |
| H | 8.978510  | 8.067267 | 10.737220 |
| H | 6.569414  | 1.541620 | 9.922679  |
| H | 5.583460  | 0.191535 | 10.450439 |
| H | 3.577050  | 0.716135 | 11.966569 |
| H | 1.404747  | 1.876650 | 11.706091 |
| H | 0.081472  | 3.707712 | 10.579683 |
| H | 0.040571  | 5.688042 | 9.104803  |
| H | 1.312278  | 7.342302 | 7.668410  |
| H | 3.476701  | 8.043719 | 6.686203  |
| H | 6.576023  | 6.039627 | 6.911604  |
| H | 5.750783  | 7.372512 | 6.074115  |
| H | 6.398163  | 7.609393 | 7.693283  |
| H | 5.637131  | 6.919917 | 9.921531  |
| H | 6.574578  | 8.140864 | 10.756953 |
| C | 6.598889  | 1.199782 | 12.064195 |
| C | 6.181250  | 6.353728 | 11.938959 |
| C | 7.733706  | 2.177120 | 12.139124 |
| H | 5.893817  | 1.401775 | 12.868395 |
| H | 7.007157  | 0.200693 | 12.226883 |
| C | 4.750004  | 6.056977 | 12.286344 |
| H | 6.694475  | 5.394859 | 11.947177 |
| H | 6.618349  | 6.933301 | 12.755176 |
| N | 7.659445  | 3.177957 | 13.007450 |
| C | 8.861167  | 2.010010 | 11.312449 |
| N | 4.577916  | 5.019226 | 13.096333 |
| C | 3.648174  | 6.799734 | 11.823055 |
| C | 8.697790  | 4.046381 | 13.118431 |

|   |           |          |           |
|---|-----------|----------|-----------|
| C | 9.909183  | 2.889447 | 11.394305 |
| H | 8.887535  | 1.186886 | 10.611183 |
| C | 3.341142  | 4.665774 | 13.499208 |
| C | 2.377488  | 6.451650 | 12.219241 |
| H | 3.802435  | 7.639136 | 11.159378 |
| N | 4.363086  | 2.932451 | 14.805723 |
| N | 7.442125  | 5.187105 | 14.803228 |
| C | 9.855214  | 3.949023 | 12.322293 |
| C | 8.578922  | 5.116377 | 14.070192 |
| H | 10.775391 | 2.779497 | 10.756169 |
| C | 3.223611  | 3.533604 | 14.378442 |
| C | 2.185560  | 5.353146 | 13.078593 |
| H | 1.519635  | 7.008713 | 11.866812 |
| C | 4.288089  | 1.869226 | 15.602960 |
| C | 7.268763  | 6.185370 | 15.661181 |
| C | 10.894389 | 4.917534 | 12.467273 |
| C | 9.614038  | 6.066047 | 14.176736 |
| C | 1.943744  | 3.091310 | 14.761555 |
| C | 0.901714  | 4.892360 | 13.506657 |
| C | 5.574855  | 1.267228 | 16.070815 |
| C | 3.042408  | 1.347142 | 15.998501 |
| C | 8.262693  | 7.171474 | 15.832072 |
| C | 5.970742  | 6.243926 | 16.405734 |
| C | 10.777727 | 5.937163 | 13.357498 |
| H | 11.772990 | 4.825738 | 11.842670 |
| C | 9.423847  | 7.112145 | 15.101424 |
| C | 1.879811  | 1.954286 | 15.589090 |
| C | 0.786193  | 3.799672 | 14.305251 |
| H | 0.022737  | 5.425588 | 13.167969 |
| H | 6.247083  | 1.096351 | 15.228750 |
| H | 6.080987  | 1.955727 | 16.752530 |
| H | 5.407599  | 0.325838 | 16.590666 |
| H | 3.015681  | 0.472792 | 16.633414 |
| H | 8.097761  | 7.968909 | 16.543580 |
| H | 5.192027  | 6.656556 | 15.757531 |
| H | 5.653007  | 5.243185 | 16.699488 |
| H | 6.045899  | 6.876878 | 17.288259 |
| H | 11.561469 | 6.678140 | 13.453626 |
| H | 10.194009 | 7.863489 | 15.226123 |
| H | 0.916505  | 1.567839 | 15.897131 |
| H | -0.186501 | 3.444528 | 14.62115  |

### **C3-singlet-PCM**

|    |          |          |           |
|----|----------|----------|-----------|
| Cu | 3.751480 | 5.404066 | 10.140956 |
| Cu | 2.870358 | 0.074515 | 8.526050  |

|   |           |           |           |
|---|-----------|-----------|-----------|
| N | 5.255326  | 5.864796  | 8.828226  |
| N | 5.093603  | 3.879489  | 10.692223 |
| N | 1.111406  | 0.722657  | 9.366990  |
| N | 1.567630  | -1.147056 | 7.467803  |
| N | 2.920613  | 6.451017  | 11.697481 |
| N | 1.792831  | 5.523339  | 9.411801  |
| N | 4.305898  | 1.170421  | 7.472458  |
| N | 4.527884  | -0.618698 | 9.502707  |
| C | 5.285958  | 6.832297  | 7.916626  |
| C | 6.395942  | 6.990620  | 7.065227  |
| H | 6.389099  | 7.783446  | 6.329823  |
| C | 7.481415  | 6.160916  | 7.193822  |
| H | 8.353586  | 6.288410  | 6.564828  |
| C | 7.467764  | 5.143025  | 8.166389  |
| C | 8.577076  | 4.274747  | 8.400531  |
| H | 9.467271  | 4.402303  | 7.797510  |
| C | 8.519656  | 3.319996  | 9.362270  |
| H | 9.363425  | 2.669561  | 9.547568  |
| C | 7.338402  | 3.135344  | 10.145229 |
| C | 7.224676  | 2.139138  | 11.132439 |
| H | 8.049440  | 1.460391  | 11.305397 |
| C | 6.075933  | 2.053985  | 11.876668 |
| H | 5.973098  | 1.306982  | 12.652141 |
| C | 5.024904  | 2.966350  | 11.659875 |
| C | 6.226440  | 3.979077  | 9.948451  |
| C | 6.303911  | 5.016678  | 8.951869  |
| C | 4.105181  | 7.745597  | 7.828616  |
| H | 4.360776  | 8.663539  | 7.302120  |
| H | 3.736454  | 7.987259  | 8.825475  |
| H | 3.289460  | 7.259387  | 7.288707  |
| C | 3.819073  | 2.941810  | 12.558925 |
| H | 3.436017  | 3.957930  | 12.655773 |
| H | 4.142579  | 2.611971  | 13.547717 |
| C | 2.675477  | 2.027876  | 12.095740 |
| H | 3.015553  | 0.989996  | 12.069608 |
| H | 1.878829  | 2.086689  | 12.840740 |
| C | 2.135726  | 2.442072  | 10.727240 |
| H | 1.880364  | 3.500639  | 10.763394 |
| H | 2.920041  | 2.328905  | 9.977110  |
| C | 0.930298  | 1.688391  | 10.260485 |
| C | -0.361407 | 2.039145  | 10.696626 |
| H | -0.477633 | 2.831943  | 11.423810 |
| C | -1.459082 | 1.397334  | 10.177646 |
| H | -2.458076 | 1.670991  | 10.492772 |
| C | -1.283035 | 0.389280  | 9.208015  |
| C | -2.367222 | -0.304896 | 8.583499  |

|   |           |           |           |
|---|-----------|-----------|-----------|
| H | -3.376462 | -0.056158 | 8.886229  |
| C | -2.137804 | -1.248881 | 7.632772  |
| H | -2.960387 | -1.771265 | 7.160547  |
| C | -0.805264 | -1.571962 | 7.224017  |
| C | -0.504025 | -2.523709 | 6.230193  |
| H | -1.308123 | -3.060451 | 5.743163  |
| C | 0.805871  | -2.755706 | 5.884770  |
| H | 1.056515  | -3.478657 | 5.120462  |
| C | 1.839397  | -2.042190 | 6.524082  |
| C | 0.283741  | -0.907217 | 7.822632  |
| C | 0.040397  | 0.084428  | 8.835036  |
| C | 3.278817  | -2.249117 | 6.169178  |
| H | 3.722875  | -1.308518 | 5.836766  |
| H | 3.393730  | -2.990523 | 5.380740  |
| H | 3.839720  | -2.577944 | 7.047154  |
| C | 3.512095  | 6.873621  | 12.810259 |
| C | 2.763164  | 7.458562  | 13.849581 |
| H | 3.271274  | 7.786836  | 14.745758 |
| C | 1.406511  | 7.617789  | 13.712448 |
| H | 0.818952  | 8.071732  | 14.500201 |
| C | 0.771882  | 7.200947  | 12.526316 |
| C | -0.624598 | 7.374575  | 12.278333 |
| H | -1.230928 | 7.836478  | 13.047264 |
| C | -0.381729 | 6.363103  | 10.087541 |
| C | -0.898776 | 5.948215  | 8.844262  |
| H | -1.944391 | 6.113768  | 8.616954  |
| C | -0.065943 | 5.356469  | 7.929662  |
| H | -0.441189 | 5.045611  | 6.964497  |
| C | 1.292011  | 5.140336  | 8.242792  |
| C | 0.990847  | 6.145135  | 10.314742 |
| C | 1.582828  | 6.599951  | 11.543213 |
| C | 4.992816  | 6.694189  | 12.925291 |
| H | 5.228506  | 5.670731  | 13.228955 |
| H | 5.412896  | 7.368925  | 13.668707 |
| H | 5.473023  | 6.867226  | 11.962315 |
| C | 2.205756  | 4.475317  | 7.254073  |
| H | 3.224352  | 4.532668  | 7.637745  |
| H | 2.171625  | 5.033974  | 6.314050  |
| C | 1.829590  | 3.015629  | 6.975387  |
| H | 0.817158  | 2.965016  | 6.568752  |
| H | 1.815490  | 2.454100  | 7.904734  |
| C | 2.773329  | 2.328266  | 5.981424  |
| H | 2.334808  | 1.364312  | 5.708254  |
| H | 2.840806  | 2.921468  | 5.068355  |
| C | 4.165116  | 2.053821  | 6.487773  |
| C | 5.289298  | 2.657625  | 5.889376  |

|   |           |           |           |
|---|-----------|-----------|-----------|
| H | 5.141550  | 3.399632  | 5.116937  |
| C | 6.555048  | 2.273435  | 6.259766  |
| H | 7.427397  | 2.708601  | 5.790160  |
| C | 6.718398  | 1.290461  | 7.252286  |
| C | 7.995374  | 0.790404  | 7.656614  |
| H | 8.876036  | 1.172720  | 7.158130  |
| C | 8.103188  | -0.121774 | 8.655084  |
| H | 9.071937  | -0.484292 | 8.974883  |
| C | 6.941053  | -0.607830 | 9.330437  |
| C | 6.995452  | -1.506149 | 10.412223 |
| H | 7.956164  | -1.852788 | 10.771930 |
| C | 5.830316  | -1.926846 | 11.006129 |
| H | 5.851165  | -2.612407 | 11.841786 |
| C | 4.589879  | -1.479257 | 10.513578 |
| C | 5.666010  | -0.167101 | 8.926569  |
| C | 5.549055  | 0.796176  | 7.864248  |
| C | 3.296189  | -1.969607 | 11.082377 |
| H | 2.608055  | -1.138647 | 11.239440 |
| H | 3.449487  | -2.495770 | 12.022827 |
| H | 2.817349  | -2.654920 | 10.377693 |
| C | -1.176773 | 6.986788  | 11.099072 |
| H | -2.230358 | 7.141449  | 10.904000 |

### **C3-triplet-PCM**

|    |          |           |           |
|----|----------|-----------|-----------|
| Cu | 3.790539 | 5.316558  | 10.095793 |
| Cu | 2.855587 | 0.178070  | 8.569107  |
| N  | 5.113074 | 5.754209  | 8.701197  |
| N  | 5.116058 | 3.964080  | 10.705453 |
| N  | 1.091042 | 0.849848  | 9.379277  |
| N  | 1.556849 | -1.047575 | 7.506509  |
| N  | 2.952783 | 6.169625  | 11.737972 |
| N  | 1.900274 | 5.562387  | 9.335696  |
| N  | 4.318116 | 1.219811  | 7.498501  |
| N  | 4.494477 | -0.545806 | 9.556118  |
| C  | 5.113033 | 6.750126  | 7.786644  |
| C  | 6.213982 | 6.968858  | 6.972895  |
| H  | 6.175351 | 7.771777  | 6.250067  |
| C  | 7.362260 | 6.173803  | 7.094545  |
| H  | 8.221901 | 6.348432  | 6.459981  |
| C  | 7.405241 | 5.181983  | 8.067518  |
| C  | 8.552710 | 4.364143  | 8.330311  |
| H  | 9.435657 | 4.510804  | 7.719948  |
| C  | 8.541747 | 3.433384  | 9.316482  |
| H  | 9.413496 | 2.820769  | 9.504656  |
| C  | 7.383791 | 3.224115  | 10.135393 |

|   |           |           |           |
|---|-----------|-----------|-----------|
| C | 7.308704  | 2.272013  | 11.143100 |
| H | 8.152322  | 1.624982  | 11.342088 |
| C | 6.135543  | 2.165363  | 11.898121 |
| H | 6.054960  | 1.427813  | 12.684546 |
| C | 5.070536  | 3.029012  | 11.684287 |
| C | 6.247877  | 4.045997  | 9.906784  |
| C | 6.254035  | 4.991697  | 8.878080  |
| C | 3.898357  | 7.618395  | 7.682997  |
| H | 4.127126  | 8.517703  | 7.114958  |
| H | 3.539769  | 7.909130  | 8.671679  |
| H | 3.081626  | 7.102663  | 7.177232  |
| C | 3.855880  | 2.915483  | 12.566642 |
| H | 3.430890  | 3.899185  | 12.758194 |
| H | 4.181893  | 2.519050  | 13.528400 |
| C | 2.745468  | 1.999896  | 12.027708 |
| H | 3.150366  | 1.006858  | 11.828714 |
| H | 1.987938  | 1.895218  | 12.807200 |
| C | 2.095201  | 2.565088  | 10.765662 |
| H | 1.779409  | 3.585026  | 10.978987 |
| H | 2.834768  | 2.594932  | 9.963257  |
| C | 0.898086  | 1.812644  | 10.274038 |
| C | -0.395759 | 2.157583  | 10.705328 |
| H | -0.518317 | 2.941958  | 11.440136 |
| C | -1.489510 | 1.516928  | 10.176569 |
| H | -2.490804 | 1.786577  | 10.487618 |
| C | -1.304086 | 0.512999  | 9.205975  |
| C | -2.384953 | -0.180298 | 8.574879  |
| H | -3.395591 | 0.071039  | 8.870563  |
| C | -2.150306 | -1.126042 | 7.627822  |
| H | -2.970084 | -1.647807 | 7.150129  |
| C | -0.814994 | -1.454881 | 7.233672  |
| C | -0.508044 | -2.416094 | 6.250795  |
| H | -1.310064 | -2.950423 | 5.757798  |
| C | 0.804352  | -2.664194 | 5.927681  |
| H | 1.059494  | -3.398189 | 5.175481  |
| C | 1.834928  | -1.956333 | 6.578062  |
| C | 0.270916  | -0.791878 | 7.839685  |
| C | 0.022965  | 0.208283  | 8.842676  |
| C | 3.277172  | -2.180786 | 6.247826  |
| H | 3.694325  | -1.290681 | 5.770459  |
| H | 3.405674  | -3.026331 | 5.574690  |
| H | 3.851711  | -2.355527 | 7.158651  |
| C | 3.549450  | 6.534052  | 12.870963 |
| C | 2.792601  | 7.085855  | 13.922619 |
| H | 3.297071  | 7.362345  | 14.837528 |
| C | 1.438764  | 7.262201  | 13.786204 |

|   |           |           |           |
|---|-----------|-----------|-----------|
| H | 0.849506  | 7.668123  | 14.598065 |
| C | 0.811330  | 6.938707  | 12.566660 |
| C | -0.577915 | 7.143314  | 12.308404 |
| H | -1.194326 | 7.551293  | 13.098754 |
| C | -0.300353 | 6.301972  | 10.050554 |
| C | -0.791912 | 5.973145  | 8.771209  |
| H | -1.833350 | 6.149829  | 8.535344  |
| C | 0.055819  | 5.432739  | 7.839885  |
| H | -0.304389 | 5.167930  | 6.856205  |
| C | 1.413513  | 5.209558  | 8.148137  |
| C | 1.068079  | 6.080565  | 10.282587 |
| C | 1.626541  | 6.398000  | 11.557467 |
| C | 5.025001  | 6.345934  | 13.012394 |
| H | 5.251497  | 5.351895  | 13.405779 |
| H | 5.429168  | 7.075876  | 13.711021 |
| H | 5.528341  | 6.447105  | 12.053094 |
| C | 2.301668  | 4.532654  | 7.148620  |
| H | 3.331409  | 4.568639  | 7.495657  |
| H | 2.251514  | 5.073222  | 6.200341  |
| C | 1.882118  | 3.074284  | 6.913248  |
| H | 0.870485  | 3.039052  | 6.504733  |
| H | 1.852896  | 2.539906  | 7.859000  |
| C | 2.817755  | 2.339982  | 5.948072  |
| H | 2.364861  | 1.374955  | 5.704677  |
| H | 2.900573  | 2.901888  | 5.016894  |
| C | 4.200264  | 2.067172  | 6.479656  |
| C | 5.336367  | 2.640675  | 5.876470  |
| H | 5.205605  | 3.355599  | 5.075890  |
| C | 6.593015  | 2.263660  | 6.282400  |
| H | 7.475596  | 2.680176  | 5.815298  |
| C | 6.733449  | 1.313668  | 7.309375  |
| C | 8.000316  | 0.816621  | 7.746292  |
| H | 8.890703  | 1.182287  | 7.252896  |
| C | 8.086230  | -0.072112 | 8.767315  |
| H | 9.047319  | -0.433316 | 9.110909  |
| C | 6.910201  | -0.541450 | 9.430335  |
| C | 6.941102  | -1.433714 | 10.517482 |
| H | 7.894088  | -1.778616 | 10.898862 |
| C | 5.763629  | -1.857396 | 11.084546 |
| H | 5.766762  | -2.544170 | 11.919592 |
| C | 4.534340  | -1.412055 | 10.563878 |
| C | 5.644635  | -0.099468 | 8.999717  |
| C | 5.551689  | 0.845993  | 7.918747  |
| C | 3.229346  | -1.916814 | 11.094608 |
| H | 2.520067  | -1.097814 | 11.216658 |
| H | 3.358931  | -2.428846 | 12.046519 |

H 2.787931 -2.621020 10.383799  
C -1.112152 6.840865 11.095253  
H -2.162942 7.006087 10.896450

## **References:**

1. B. Ravel and M. Newville, *J.Synchrotron.Radiat.*, 2005, **12**, 537-541.
2. J. J. Rehr, R. C. Albers and S. I. Zabinsky, *Phys.Rev.Lett.*, 1992, **69**, 3397-3400.
3. D. C. Koningsberger and R. Prins, *X Ray Absorption: Principles, Applications, Techniques of EXAFS, SEXAFS and XANES*, John Wiley & Sons (New York), 1988.
4. P. K. Pal, S. Chowdhury, P. Purkayastha, D. A. Tocher and D. Datta, *Inorg.Chem.Commun.*, 2000, **3**, 585-589.
5. J. Lange, H. Elias, H. Paulus, J. Müller and U. Weser, *Inorg.Chem.*, 2000, **39**, 3342-3349.
6. D. E. Díaz, L. Llanos, P. Arce, R. Lorca, J. Guerrero, J. Costamagna, D. Aravena, G. Ferraudi, A. Oliver, A. G. Lappin and L. Lemus, *Chem.Eur.J*, 2018, **24**, 13839-13849.
7. T. J. Penfold, S. Karlsson, G. Capano, F. A. Lima, J. Rittmann, M. Reinhard, M. H. Rittmann-Frank, O. Braem, E. Baranoff, R. Abela, I. Tavernelli, U. Rothlisberger, C. J. Milne and M. Chergui, *J.Phys.Chem.A*, 2013, **117**, 4591-4601.
8. L. X. Chen, G. Jennings, T. Liu, D. J. Gosztola, J. P. Hessler, D. V. Scaltrito and G. J. Meyer, *J.Am.Chem.Soc.*, 2002, **124**, 10861-10867.
9. L. X. Chen, G. B. Shaw, I. Novozhilova, T. Liu, G. Jennings, K. Attenkofer, G. J. Meyer and P. Coppens, *J.Am.Chem.Soc.*, 2003, **125**, 7022-7034.
10. M. W. Mara, K. A. Fransted and L. X. Chen, *Coord.Chem.Rev.*, 2015, **282–283**, 2-18.
11. A. D. Becke, *J.Chem.Phys.*, 1993, **98**, 5648-5652.
12. C. Lee, W. Yang and R. G. Parr, *Phys. Rev.B*, 1988, **37**, 785-789.
13. F. Weigend and R. Ahlrichs, *Phys.Chem.Chem.Phys.*, 2005, **7**, 3297-3305.
14. A. Schäfer, C. Huber and R. Ahlrichs, *J.Chem.Phys*, 1994, **100**, 5829-5835.
15. S. Grimme, J. Antony, S. Ehrlich and H. Krieg, *J.Chem.Phys.*, 2010, **132**, 154104.
16. B. Mennucci and J. Tomasi, *J.Chem.Phys.* 1997, **106**, 5151-5158.
